1 **The *PIF1-MIR408-Plantacyanin* Repression Cascade Regulates Light Dependent Seed**  
2 **Germination**

3

4 Anlong Jiang<sup>1,2</sup>, Zhonglong Guo<sup>1</sup>, Jiawei Pan<sup>1,#</sup>, Yan Zhuang<sup>2</sup>, Daqing Zuo<sup>1</sup>, Chen Hao<sup>1</sup>, Zhaoxu  
5 Gao<sup>2</sup>, Peiyong Xin<sup>3</sup>, Jinfang Chu<sup>3</sup>, Shangwei Zhong<sup>1</sup>, Lei Li<sup>1,2,\*</sup>

6

7 <sup>1</sup>State Key Laboratory of Protein and Plant Gene Research, School of Life Sciences and School  
8 of Advanced Agricultural Sciences, Peking University, Beijing 100871, China

9 <sup>2</sup>Peking-Tsinghua Center for Life Sciences, Academy for Advanced Interdisciplinary Studies,  
10 Peking University, Beijing 100871, China

11 <sup>3</sup>National Center for Plant Gene Research (Beijing), Institute of Genetics and Developmental  
12 Biology, Chinese Academy of Sciences, Beijing 100101, China

13

14 # Present address: Syngenta Group China, Beijing 100031, China

15 \* Corresponding author (lei.li@pku.edu.cn)

16 **ABSTRACT**

17 Light-sensing seed germination is a vital process for the seed plants. A decisive event in light-  
18 induced germination is degradation of the central repressor PHYTOCHROME INTERACTING  
19 FACTOR1 (PIF1). It is also known that the balance between gibberellic acid (GA) and abscisic  
20 acid (ABA) critically controls germination. But the cellular mechanisms linking PIF1 turnover to  
21 hormonal rebalancing remain elusive. Here, employing far-red light-induced *Arabidopsis* seed  
22 germination as the experimental system, we identified Plantacyanin (PLC) as an inhibitor of  
23 germination, which is a storage vacuole-associated blue copper protein highly expressed in  
24 mature seed and rapidly silenced during germination. Molecular analyses showed that PIF1  
25 directly binds to the *MIR408* promoter and represses miR408 accumulation, which in turn post-  
26 transcriptionally modulates *PLC* abundance, thus forming the *PIF1-MIR408-PLC* repression  
27 cascade for translating PIF1 turnover to PLC turnover during early germination. Genetic analysis,  
28 RNA-sequencing, and hormone quantification revealed that *PLC* is necessary and sufficient to  
29 maintain the *PIF1*-mediated seed transcriptome and the low-GA-high-ABA state. Furthermore,  
30 we found that *PLC* domain organization and regulation by miR408 are conserved features in  
31 seed plants. These results unraveled a cellular mechanism whereby PIF1-relayed external light  
32 signals are converted through PLC-based copper mobilization into internal hormonal profiles for  
33 controlling seed germination.

34

35 **Keywords**

36 Seed germination; Gibberellic acid; Abscisic acid; Light signaling; Copper homeostasis;  
37 Plantacyanin; miR408; PIF1

## 38 **Introduction**

39 The seed is an embryonic plant enclosed in a protective capsule. After reaching full size, the  
40 embryo undergoes elaborate dehydration to establish a dormant state that helps the embryo  
41 withstand extreme environments and survive for long periods (Bewley 1997; Finch-Savage and  
42 Leubner-Metzger, 2006; Angelovici et al., 2010). Given the right environmental conditions, the  
43 desiccated seed germinates by taking up water and resuming embryo development, utilizing  
44 energy and nutrient stored in the seed (Bewley 1997; Finch-Savage and Leubner-Metzger, 2006;  
45 Finkelstein et al., 2008; Née et al., 2017). GA and ABA are the main plant hormones that control  
46 seed dormancy and germination. As the embryo matures, ABA is synthesized and signals the  
47 embryo to initiate the buildup of storage compounds and undergo desiccation (Nambara and  
48 Marion-Poll, 2005; Finkelstein et al., 2008; Angelovici et al., 2010; Shu et al., 2016). ABA is  
49 also important for maintaining seed dormancy and preventing precocious germination (Bewley  
50 1997; Finch-Savage and Leubner-Metzger, 2006; Finkelstein et al., 2008). Conversely, GA is a  
51 crucial hormone to break down dormancy and promote germination (Kallioo and Piironen 1959;  
52 Bewley 1997; Finch-Savage and Leubner-Metzger, 2006; Yamaguchi, 2008). It has been well-  
53 established that the GA/ABA balance critically determines the germination capacity (Nambara  
54 and Marion-Poll, 2005; Yamaguchi, 2008; Shu et al., 2016; Née et al., 2017).

55 Seed monitors a wide range of environmental factors, including ambient light, for  
56 germination decision-making (Oh et al., 2004; Finch-Savage and Leubner-Metzger, 2006; Seo et  
57 al., 2009; Jiang et al., 2016). Molecular mechanisms of light perception and signaling during  
58 germination are well understood in the model plant *Arabidopsis*. The basic helix-loop-helix type  
59 transcription factor PIF1 is an essential negative regulator of light-dependent germination (Oh et  
60 al., 2004; Leivar and Quail, 2010; Shi et al., 2015). PIF1 is stabilized by DE-ETIOLATED 1 and  
61 other signaling molecules and thus highly accumulates in the seed kept in darkness (Oh et al.,  
62 2004; 2006; Shi et al., 2015). Under light irradiation, phytochromes are activated and enter the  
63 nucleus to interact with PIF1, thereby reducing its activity and promoting its degradation via the  
64 26S proteasome (Oh et al., 2006; Castillon et al., 2007; Shen et al., 2008; Leivar and Quail,  
65 2010). Rapid removal of PIF1 is critical for maintaining the light-regulated transcriptome in  
66 imbibed seed (Oh et al., 2009; Shi et al., 2013; Pfeiffer et al., 2014) and ultimately establishing  
67 the high-GA-low-ABA state (Oh et al., 2006; 2007). However, extensive search has not revealed  
68 a direct link between PIF1 and genes involved in GA and ABA metabolism (Oh et al., 2007;

69 2009; Cho et al., 2012). Consequently, the cellular events ensued by PIF1 turnover that lead to  
70 hormonal rebalancing have not been elucidated and it is not known whether these events are  
71 conserved in seed plants.

72 A fundamental cellular process during seed germination is the mobilization of mineral  
73 nutrients sequestered in the storage vacuoles to sustain embryo growth before efficient uptake  
74 systems are established in the root (Lanquar et al., 2005; Kim et al., 2006; Roschztardt et al.,  
75 2009; Née et al., 2017; Paszkiewicz et al., 2017). Studies in *Arabidopsis* and other plants have  
76 shown that transition metals are released from vacuolar stores via tonoplast-localized  
77 transporters and then transported to various cellular destinations (Lanquar et al., 2005; Kim et al.,  
78 2006; Eroglu et al., 2017). While the physiological consequences of insufficient or mis-regulated  
79 mineral mobilization have been abundantly documented (Lanquar et al., 2005; Kim et al., 2006),  
80 whether metal mobilization contributes to hormonal profile establishment in light dependent  
81 germination is not well characterized.

82 Copper is an essential transition metal by serving as the cofactor for a number of  
83 cuproproteins with vital functions (Burkhead et al., 2009; Peñarrubia et al., 2015). Because free  
84 cellular copper is highly reactive and produces detrimental hydroxyl radicals, elaborate  
85 homeostasis and transport systems are present for the precise control of copper delivery to  
86 specific targets (Burkhead et al., 2009). The *Arabidopsis* genome encodes approximately 260  
87 copper dependent proteins (Schulten et al., 2019). Among them, small blue copper proteins,  
88 containing a characteristic mononuclear type-I copper binding site, play important roles in redox  
89 reactions and copper homeostasis (Rydén and Hunt 1993; Guss et al., 1998; De Rienzo et al.  
90 2000; Giri et al. 2004). Plastocyanin is the most abundant small blue copper protein in plants and  
91 an indispensable electron carrier in the Z-scheme of photosynthesis (Molina-Heredia et al., 2003;  
92 Weigel et al., 2003). Plants also have a specific family of blue copper proteins called  
93 phytoeyanins that are divided into four subfamilies, including PLCs, uclacyanins, stellacyanins,  
94 and early nodulin-like proteins, based on differences in the copper binding site and domain  
95 organization (Guss et al., 1998; Nersissian et al., 1998; Sun et al., 2019). Phytoeyanins have been  
96 widely implicated in plant development processes such as pollen tube chemotropism and nodule  
97 development (Kim et al. 2003; Dong et al. 2005; Sun et al., 2019). They have also been  
98 implicated in stress responses such as pathogen resistance and drought and salinity tolerance  
99 (Jung and Hwang 2000; Ruan et al. 2011; Feng et al., 2013). However, their involvement in seed

100 germination has not been investigated.

101       In this study, we focused on *PLC* that is highly expressed in the seed with contrasting  
102 expression patterns during seed development and germination. Through comprehensive  
103 molecular and genetic analyses, we delineated the *PIF1-MIR408-PLC* repression cascade for  
104 regulating PLC turnover during far-red light induced germination. We showed that PLC locates  
105 to the storage vacuole and is necessary and sufficient to maintain *PIF1*-mediated seed  
106 transcriptome and the low-GA-high-ABA state. These results unraveled PLC-based copper  
107 mobilization as a potentially conserved cellular mechanism for converting PIF1-relayed light  
108 signals into hormonal profiles that control seed germination.

109



## 111 RESULTS

### 112 ***PLC* Exhibits Distinctive Expression Pattern in Seed Development and Germination**

113 To investigate whether the phytoeyanin encoding genes are involved in seed germination, we  
114 examined their expression pattern using a gene expression atlas in *Arabidopsis* (eFP Browser;  
115 Winter et al., 2007). We found that 31 of the 37 phytoeyanin genes were expressed during seed  
116 formation and germination (Figure 1A). Among these, the single gene encoding *PLC*  
117 (At2g02850) exhibited the highest expression level in mature seed (Figure 1A). *PLC* transcript  
118 level was low in early seed development, but was drastically induced at seed stage 7,  
119 progressively increased thereafter, and peaked at seed maturation (Figure 1B). Interestingly, *PLC*  
120 was drastically silenced upon vernalization-induced germination (Figure 1B). To validate *PLC*  
121 expression pattern in the germination phase at the protein level, we generated the *pPLC:PLC-*  
122 *GFP* transgenic *Arabidopsis* plants in which the *PLC* coding sequence was fused to the green  
123 fluorescence protein (GFP) and driven by the native *PLC* promoter. Immunoblotting with an  
124 antibody against GFP revealed that the level of the *PLC*-GFP fusion protein was drastically  
125 decreased 24 h after vernalization (Figure 1C). These results indicate that *PLC* is highly  
126 expressed in mature seed and silenced during germination.

127 To elucidate the dynamics of *PLC* repression during light-induced germination, we  
128 employed a previously described far-red light initiated, phytochrome A (phyA) dependent  
129 germination assay (Oh et al., 2006; 2009; Cho et al., 2012). In the so-called phyA<sub>OFF</sub> regime of  
130 this assay, imbibed seeds are exposed to brief far-red light to inactivate phyB, then kept in  
131 darkness to allow inactive phyA to accumulate that does not break dormancy. In the phyA<sub>ON</sub>  
132 regime, a second far-red irradiation with longer duration is used to activate phyA that induces  
133 germination (Figure 1D). Using reverse transcription coupled quantitative PCR (RT-qPCR), we  
134 observed that *PLC* transcript level remained steady during the time course of phyA<sub>OFF</sub> (Figure  
135 1E). In contrast, after the second far-red irradiation in phyA<sub>ON</sub>, *PLC* level was maintained only  
136 until the 2 h time point, but drastically reduced by 4 h, and remained low thereafter (Figure 1E).

137 To reveal subcellular localization of *PLC*, we transiently expressed the *PLC*-GFP reporter  
138 in onion epidermal cells and found that the GFP signals predominantly aligned the periphery of  
139 the central vacuole (Figure 1F). COPT5 is a member of the CTR-like high-affinity Cu  
140 transporters residing on the tonoplast (Klaumann et al., 2011). We found that *PLC*-GFP  
141 colocalized with mCherry-tagged COPT5 co-expressed in the same onion epidermal cell (Figure

142 1F), indicating that transiently expressed PLC is associated with the vacuole. To examine PLC  
143 localization in the seed, we utilized the *pPLC:PLC-GFP* transgenic line. In imbibed seed kept in  
144 darkness, GFP fluorescence was observed surrounding autofluorescence of storage vacuoles  
145 (Figure 1G) (Paszkiwicz et al., 2017). Consistent with the expression profile of *PLC* (Figure  
146 1E), the GFP signals disappeared after far-red irradiation (Figure 1G). These observations  
147 indicate that storage vacuole-associated PLC is rapidly silenced following phyA activation.

148

### 149 ***PLC* Negatively Regulates Germination**

150 The expression pattern of *PLC* inspired us to genetically investigate its role in germination. We  
151 employed the previously characterized *Arabidopsis* mutant with an intronic T-DNA insertion  
152 (Dong et al., 2005) and named this knockdown allele *plc-1* (Supplemental Figure 1A). We also  
153 generated a deletion mutant using the CRISPR/Cas9 system with paired guide RNAs. The  
154 resulting homozygous mutant, containing a 506 bp deletion that spans the entire coding region,  
155 was named *plc-2* (Supplemental Figure 1A). RT-qPCR confirmed that the *plc-2* allele had  
156 essentially undetectable *PLC* transcript level in comparison to the wild type (Supplemental  
157 Figure 1B). Consistent with previous characterization of *plc-1* (Dong et al., 2005), we found that  
158 both *plc* mutants exhibited no apparent difference in the appearance of mature seed compared to  
159 the wild type (Supplemental Figure 1C). However, in contrast to the wild type seed that failed to  
160 germinate in phyA<sub>OFF</sub>, germination frequency of *plc-1* and *plc-2* significantly increased to 17.3%  
161 and 23.3% by 120 h in phyA<sub>OFF</sub>, respectively (Figure 2A and 2B). The approximately 40%  
162 germination rate of wild type seed in phyA<sub>ON</sub> was significantly elevated to 48.0% and 62.7% for  
163 *plc-1* and *plc-2*, respectively (Figure 2A and 2C). These results indicate that *PLC* is necessary for  
164 effective inhibition of germination in both phyA<sub>OFF</sub> and phyA<sub>ON</sub>.

165 Moreover, we generated the *iPLC-OX* transgenic *Arabidopsis* plants in which the  
166 expression of *PLC* was under the control of a  $\beta$ -estradiol-inducible promoter (Zuo et al., 2000).  
167 Mature seed of this line also exhibited no morphological difference from the wild type  
168 (Supplemental Figure 1C). The *PLC* transcript was induced to high levels in the *iPLC-OX* seed  
169 under both phyA<sub>OFF</sub> and phyA<sub>ON</sub> but maintained its normal pattern in the wild type after the  
170 application of  $\beta$ -estradiol (Figure 2D; Supplemental Figure 1D). We found that  $\beta$ -estradiol  
171 treatment significantly reduced germination rate of the *iPLC-OX* seed, but not of the wild type,  
172 in both phyA<sub>OFF</sub> and phyA<sub>ON</sub> (Figure 2E and 2F). These results indicate that *PLC* is sufficient for



173 inhibiting germination.

174 Young seedlings germinated in darkness switch to a different growth mode, termed  
175 greening, upon exposure to light (Zhong et al., 2009). Visual inspection revealed that *PLC*  
176 represses this process as the greening rate of *plc-2* (referred to as *plc* hereafter) was significantly  
177 higher than that of the wild type after dark-germinated seedlings were exposed to white light for  
178 24 h (Figure 3A and 3B). Fluorescence spectral analysis confirmed that the levels of both  
179 chlorophylls and the precursor protochlorophyllide in *plc* seedlings were higher than those in the  
180 wild type (Figure 3C). Collectively, these results established *PLC* as a negative regulator for  
181 germination and the ensued post-germinative growth in light.

182

### 183 ***PLC* Is Silenced by miR408 during Germination**

184 In our quest of identifying upstream regulators for *PLC*, we noted that *PLC* is a proven target of  
185 miR408 (Abdel-Ghany and Pilon, 2008; Zhang and Li, 2013). Using the standard assay of 5'  
186 RNA ligation-based amplification of cDNA ends, we reassured miR408-guided cleavage of *PLC*  
187 mRNA in imbibed seed, which occurred between the 10<sup>th</sup> and 11<sup>th</sup> nucleotides in the miR408  
188 recognition site (Figure 4A). From degradome sequencing data for young seedlings, we retrieved  
189 reads mapped to the predicted miR408 recognition site in *PLC* (Figure 4B), further confirming  
190 miR408 mediated cleavage of the *PLC* transcript. RT-qPCR analysis showed that miR408 level  
191 in the seed was stable in the phyA<sub>OFF</sub> regime but drastically elevated 2 h after the second far-red  
192 irradiation and peaked at 8 h in phyA<sub>ON</sub> (Figure 4C). Thus, miR408 and *PLC* exhibit reciprocal  
193 expression pattern following phyA activation (compare Figure 1E and 4C).

194 To test the effect of miR408 on *PLC* expression during germination, we employed the  
195 miR408-overexpressing line (*miR408-OX*) in which the enhanced Cauliflower Mosaic Virus 35S  
196 promoter was used to drive miR408 expression and the miR408-silencing line (*amiR408*)  
197 generated by the artificial miRNA method (Zhang and Li, 2013; Zhang et al., 2014). In the  
198 *miR408-OX* and *amiR408* seeds, expression of *PLC* in phyA<sub>OFF</sub> was significantly decreased and  
199 increased in comparison to the wild type, respectively (Figure 4D). In phyA<sub>ON</sub>, while *PLC* level  
200 was generally lowered compared to that in phyA<sub>OFF</sub>, the trend of relative *PLC* abundance in the  
201 wild type, *miR408-OX*, and *amiR408* seeds maintained the same (Figure 4D). Taken together,  
202 these results indicate that miR408 negatively modulates *PLC* transcript level through the  
203 canonical transcript cleavage mechanism during early seed germination.

204

## 205 **miR408 Is a Positive Regulator of Germination**

206 To investigate the role of miR408 in germination, we examined phenotypes of the *miR408-OX*  
207 and *amiR408* seeds (Figure 5A). In phyA<sub>OFF</sub>, the wild type and *amiR408* seeds both failed to  
208 germinate while the germination frequency of *miR408-OX* increased to about 80% over the time  
209 course (Figure 5B). In phyA<sub>ON</sub>, virtually 100% of the *miR408-OX* seed germinated after 120 h  
210 (Figure 5C). In contrast, the germination frequency of *amiR408* only reached approximately 30%  
211 after 120 h in phyA<sub>ON</sub>, significantly lower than that of the wild type (Figure 5C). Additionally,  
212 we found that miR408 promotes the greening process as the greening rate of *miR408-OX* and  
213 *amiR408* was significantly higher and lower than that of the wild type, respectively (Figure 5D to  
214 5F). These results demonstrate miR408 as a positive regulator for germination and post-  
215 germinative growth in light.

216 Because the phenotype of *miR408-OX* was stronger than that of *plc*, we examined other  
217 miR408 target genes in germination. In *Arabidopsis*, miR408 has four validated targets that all  
218 encode cuproproteins, including *PLC*, *LACCASE 3*, *12*, and *13* (Abdel-Ghany and Pilon, 2008;  
219 Zhang and Li, 2013; Zhang et al., 2014). Based on known expression profiles (Winter et al.,  
220 2007; Zhuang et al., 2020), the three *LAC* genes did not exhibit substantial expression in the seed  
221 (Supplemental Figure 2A). Phenotypic comparison of the *lac3*, *lac12*, *lac13*, and *plc* single  
222 mutants revealed that only *plc* displayed significantly elevated germination frequency than the  
223 wild type in both phyA<sub>OFF</sub> and phyA<sub>ON</sub> (Supplemental Figure 2B). We further generated the  
224 *lac12 lac13* double mutant and the *plc lac12 lac13* triple mutant. We found that the *plc lac12*  
225 *lac13* seed exhibited the same germination phenotype as *plc* while *lac12 lac13* showed no  
226 difference from the wild type (Supplemental Figure 2C). These results indicate that other  
227 miR408 target genes are not involved in germination. Thus, whether the relatively weaker  
228 phenotype of *PLC* loss-of-function was due to the compensation by other phytochemicals warrants  
229 further investigation.

230

## 231 **PIF1 Directly Suppresses *MIR408* to Promote *PLC* Expression**

232 Our next goal was to find out how the miR408-*PLC* module is regulated by light signaling.  
233 Previously, we reported that ELONGATED HYPOCOTYL 5 (HY5), by binding to the G-box in  
234 the *MIR408* promoter, activates *MIR408* in response to increasing light irradiation (Zhang et al.,

235 2014). Since PIFs and HY5 could antagonistically adjust the expression of common target genes  
236 (Chen et al., 2013; Toledo-Ortiz et al., 2014; Shi et al., 2018), we investigated the possibility that  
237 PIF1 transcriptionally represses *MIR408*. Using PIF1 chromatin immunoprecipitation (ChIP)  
238 sequencing data (Pfeiffer et al., 2014), we identified a significant PIF1 binding peak in the  
239 *MIR408* promoter encompassing the G-box (Figure 6A). Using the *PIF1-OX* line expressing  
240 MYC-tagged PIF1 driven by the 35S promoter (Oh et al., 2004), we performed ChIP with an  
241 anti-MYC antibody. qPCR analysis revealed that PIF1 occupancy at the G-box containing DNA  
242 fragment was enriched over fivefold in *PIF1-OX* relative to the wild type (Figure 6B),  
243 confirming *PIF1* as a direct upstream regulator of *MIR408*.

244 To ascertain the net effect of PIF1 on the *MIR408* promoter, we employed the firefly  
245 luciferase (LUC) and *Renilla* luciferase (REN) dual reporter system (Hellens et al., 2005). We  
246 generated the *pMIR408:LUC* reporter and the 35S:*PIF1* effector constructs (Figure 6C).  
247 Following transfection of tobacco leaf protoplasts, we found that co-expression of *PIF1*  
248 significantly reduced the LUC/REN ratio (Figure 6D), indicating that PIF1 negatively modulates  
249 the *MIR408* promoter. To corroborate this relationship in *Arabidopsis*, we fused the  $\beta$ -  
250 *glucuronidase* (*GUS*) coding region with the *MIR408* promoter and expressed the same reporter  
251 gene in either the wild type (*pMIR408:GUS/WT*) or *pif1* (*pMIR408:GUS/pif1*) background  
252 (Figure 6E). We found that GUS activity, mainly detected in the cotyledons of imbibed seed, was  
253 higher in the *pif1* background in both phyA<sub>OFF</sub> and phyA<sub>ON</sub> (Figure 6E), confirming *PIF1*-  
254 mediated suppression of *MIR408* in planta.

255 To monitor the influence of *PIF1* on miR408 and *PLC* transcript accumulation, we  
256 performed RT-qPCR analysis of the *pif1* and *PIF1-OX* lines. This analysis revealed that miR408  
257 abundance significantly increased in *pif1* but decreased in *PIF1-OX* in both phyA<sub>OFF</sub> and phyA<sub>ON</sub>  
258 with reference to the wild type (Figure 6F). Conversely, *PLC* abundance significantly increased  
259 in *PIF1-OX* but decreased in *pif1* in both phyA<sub>OFF</sub> and phyA<sub>ON</sub> (Figure 6G). Taken together,  
260 these results demonstrate that PIF1 binds to the *MIR408* promoter and represses accumulation of  
261 miR408 in the seed, which in turn post-transcriptionally silences *PLC*, thereby forming a *PIF1*-  
262 *MIR408-PLC* repression cascade.

263

## 264 ***PIF1*, *MIR408*, and *PLC* Act in the Same Pathway to Regulate Germination**

265 Consistent with previously reports (Oh et al., 2004), we found that *pif1* seed completely

266 germinated by 72 h in both *phyA*<sub>OFF</sub> and *phyA*<sub>ON</sub> (Figure 7A). This enhanced germination  
267 phenotype was observed for the *miR408-OX* and *plc* seeds as well (Figure 2B and 5B).  
268 Conversely, *PIF1-OX* seed failed to germinate even by 120 h in *phyA*<sub>ON</sub> (Figure 7B). We found  
269 that *amiR408* and  $\beta$ -estradiol treated *iPLC-OX* seeds exhibited similar phenotypes like *PIF1-OX*  
270 (Figure 2F and 5C). These results indicate that the molecularly delineated *PIF1-MIR408-PLC*  
271 repression cascade was in line with the germination phenotypes of the relevant mutants.

272 To further confirm that *PIF1*, *MIR408*, and *PLC* acts in the same genetic pathway, we  
273 generated and analyzed three double mutants involving *pif1* and *PIF1-OX*. We found that  
274 germination rate of the *pif1 amiR408* seed was substantially reduced compared to that of *pif1*  
275 (Figure 7A). By 120 h in *phyA*<sub>OFF</sub> and *phyA*<sub>ON</sub>, the near complete germination of *pif1* was  
276 lowered to about 40% and 80% by *amiR408*, respectively (Figure 7A). Regarding the *PIF1-OX*  
277 *miR408-OX* double overexpression seed, over 20% germinated by 120 h in *phyA*<sub>ON</sub> (Figure 7B),  
278 indicating that *miR408-OX* was able to partially rescue the germination defect of *PIF1-OX*.  
279 These results demonstrate that *MIR408* is downstream of *PIF1* in the same pathway. We also  
280 tested the genetic relationship between *PLC* and *PIF1* by generating the *PIF1-OX plc* line. We  
281 found that the germination profile of this line was similar to that of the wild type with  
282 substantially increased rates than *PIF1-OX* in both *phyA*<sub>OFF</sub> and *phyA*<sub>ON</sub> (Figure 7C), indicating  
283 that *PLC* is also downstream of *PIF1*. Thus, *PIF1*, *MIR408*, and *PLC* act sequentially in the  
284 same pathway to regulate seed germination.

285

### 286 ***PIF1*, *MIR408*, and *PLC* Regulate Overlapping Cohorts of Genes**

287 As a master transcriptional regulator, *PIF1* programs the seed germination related transcriptome  
288 (Oh et al., 2009; Shi et al., 2013; Pfeiffer et al., 2014). To test whether that transcriptome is  
289 regulated through the *PIF1-MIR408-PLC* pathway, we performed RNA-sequencing analysis of  
290 the wild type, *pif1*, and *miR408-OX* seeds imbibed in darkness. The *iPLC-OX* imbibed seed with  
291 or without  $\beta$ -estradiol treatment was also analyzed. Consistent with previous reports (Oh et al.,  
292 2009; Shi et al., 2013), we identified 5,640 genes that were differentially expressed between *pif1*  
293 and the wild type, which was defined as the *PIF1*-regulated set (Figure 8A). Genes differentially  
294 expressed between *miR408-OX* and the wild type were defined as the *MIR408*-regulated set,  
295 which included 4,294 genes (Figure 8A). Differentially expressed genes in *iPLC-OX* with and  
296 without  $\beta$ -estradiol treatment were defined as the *PLC*-regulated set, which included 14,646

297 genes (Figure 8A).

298 Venn diagram analysis revealed that there were 2,651 common genes between the *PIF1*-  
299 regulated and the *MIR408*-regulated sets, 4,482 common between the *PIF1*-regulated and the  
300 *PLC*-regulated sets, and 3,294 common between the *MIR408*-regulated and the *PLC*-regulated  
301 sets (Figure 8A). Based on Pearson correlation coefficient of fold changes against the controls,  
302 we found that these common genes exhibited high pairwise correlations between the compared  
303 genotypes (Figure 8B). Venn diagram analysis further revealed 2,290 genes that were  
304 differentially expressed in *pif1*, *miR408-OX*, and *iPLC-OX* compared to the respective controls  
305 (Figure 8A). Clustering analysis showed that the vast majority of these genes was regulated in  
306 the same direction in *pif1* and *miR408-OX* but the opposite direction in *iPLC-OX* (Figure 8C).  
307 Together these results indicate that the *PIF1-MIR408-PLC* pathway regulates large cohorts of  
308 common target genes in the seed.

309 Since 79.5% of the *PIF1*-related genes, or 4,482 out of 5,640, was differentially regulated  
310 in *iPLC-OX* (Figure 8A), which also exhibited the highest pairwise correlation among the  
311 genotypes ( $R = 0.884$ ; Figure 8B), we selected the *PIF1-PLC* coregulated genes for further  
312 analyses (Supplemental Dataset 1). Gene Ontology (GO) analysis revealed that the *PIF1-PLC*  
313 coregulated genes were preferentially associated with terms in two categories: seed development  
314 and germination, and hormone metabolism and signaling (Supplemental Figure 3). For example,  
315 the GO term “seed germination” was associated with 218 genes in *Arabidopsis* (Supplemental  
316 Dataset 2). These genes could be divided into three groups based on their expression pattern in  
317 *pif1* (Figure 8D). Genes in group I (40 out of 218, or 18.3%) and III (41 out of 218, or 18.8%)  
318 were substantially down-regulated and up-regulated in *pif1*, respectively. They were reversely  
319 modulated in *iPLC-OX* (Figure 8D).

320 Further inspection revealed that many individual genes that have been genetically or  
321 functionally implicated in germination related processes were included in group I and III  
322 (Supplemental Figure 4). For example, *SOM* and *RVE2* from group I were reported to inhibit  
323 light dependent germination (Kim et al., 2008; Jiang et al., 2016). On the contrary, *JMJ22* and  
324 *MAN7* from group III were reported to promote seed germination (Iglesias-Fernández et al., 2011;  
325 Cho et al., 2012). These two types of genes were regulated in an opposite pattern in *pif1* and  
326 *iPLC-OX* (Figure 8E). Collectively, these results indicate that *PLC* is a key node downstream of  
327 *PIF1* to mediate the transcriptomic changes underlying light dependent germination.

328

### 329 **The *PIF1-MIR408-PLC* Pathway Regulates GA and ABA Biosynthesis**

330 As rapid removal of PIF1 is critical for ultimately establishing the high-GA-low-ABA state, we  
331 examined whether PLC impacts the GA-ABA balance. To this end, we first inspected gene  
332 expression profile along the GA metabolic pathway. This analysis revealed that the *PIF1-*  
333 *MIR408-PLC* pathway regulates in particular *GA3ox1* and *GA2ox2*, which encode the GA3-  
334 oxidase that catalyzes the terminal GA biosynthetic step and the GA2-oxidase that catabolizes  
335 bioactive GAs, respectively (Figure 9A) (Yamaguchi, 2008). This finding was corroborated by  
336 RT-qPCR analysis showing that *GA3ox1* was up-regulated in *pif1*, *miR408-OX*, and *plc*, but  
337 down-regulated in *PIF1-OX* and *amiR408* seeds compared to the wild type in both phyA<sub>OFF</sub> and  
338 phyA<sub>ON</sub> (Figure 9B). In contrast, *GA2ox2* was up-regulated in *PIF1-OX* and *amiR408* but down-  
339 regulated in *pif1*, *miR408-OX*, and *plc* seeds relative to the wild type (Figure 9B). These results  
340 indicate that the *PIF1-MIR408-PLC* pathway targets the *GA3ox* and *GA2ox* steps in GA  
341 biosynthesis to regulate the level of bioactive GA.

342 Next, we directly quantified the amount of bioactive GA in the seed using the ultrahigh-  
343 performance liquid chromatography-triple quadrupole mass spectrometry (UPLC-MS/MS)  
344 method (Fu et al. 2012; Ma et al., 2015). Compared to the wild type, level of GA<sub>4</sub>, the major  
345 bioactive GA in *Arabidopsis* seed (Oh et al., 2006), was significantly elevated in *pif1*, *miR408-*  
346 *OX*, and *plc* seeds (Figure 9C). In *PIF1-OX* and *amiR408*, GA<sub>4</sub> level was significantly reduced  
347 compared to the wild type (Figure 9C). These results indicate that the *PIF1-MIR408-PLC*  
348 pathway is capable of modulating the level of bioactive GA in the seed.

349 We further performed pharmacological analyses using bioactive GA<sub>3</sub> and paclobutrazol, an  
350 inhibitor of GA biosynthesis. We found that GA<sub>3</sub> application promoted all seeds, including  
351 *PIF1-OX* and *amiR408*, to complete germination in phyA<sub>OFF</sub> (Figure 9D). Conversely,  
352 paclobutrazol blocked germination of all seeds, including *pif1*, *miR408-OX*, and *plc*, in phyA<sub>ON</sub>  
353 (Figure 9D). Taken together, the gene expression, hormone quantification, and pharmacological  
354 results demonstrate that the *PIF1-MIR408-PLC* cascade regulates germination by modulating the  
355 level of bioactive GA in the seed.

356 Transcriptomic profiling also revealed that *ABA1*, *NCED6* and *NCED9* were among the  
357 most substantially influenced ABA biosynthetic genes, which were downregulated in *pif1* and  
358 *miR408-OX* but upregulated in  $\beta$ -estradiol treated *iPLC-OX* seeds compared to the controls



359 (Figure 10A). RT-qPCR analysis confirmed that *ABAI*, *NCED6* and *NCED9* were positively  
360 regulated by *PIF1* and *PLC* but negatively regulated by miR408 in both phyA<sub>OFF</sub> and phyA<sub>ON</sub>  
361 (Figure 10B). Chemical quantification showed that endogenous ABA level in *pif1*, *miR408-OX*,  
362 and *plc* seeds was significantly reduced compared to that in the wild type (Figure 10C).  
363 Furthermore, we found that pharmacological treatment with ABA blocked germination of all  
364 seeds, including *pif1*, *miR408-OX*, and *plc* in phyA<sub>ON</sub> (Figure 10D). Together, these results  
365 indicate that the *PIF1-MIR408-PLC* pathway regulates germination through reciprocally  
366 modulating the biosynthesis of GA and ABA.

367

### 368 **PLC Is Conserved in Seed Plants**

369 Finally, to provide phylogenetic evidence supporting PLC as a key node in germination, we  
370 examined PLC conservation in seed plants. Searching for putative PLC orthologs from  
371 sequenced land plant genomes identified 276 PLC sequences from 52 seed plants but not non-  
372 seed plants (Figure 11; Supplemental Figure 5). Comparison of PLC sequences and domain  
373 organization to the most homologous blue copper proteins in three representative non-seed plants  
374 revealed two salient features of PLC. First, all PLCs were found to contain only a signal peptide  
375 at the N-terminus and a type-I copper binding motif at the C-terminus (Figure 11; Supplemental  
376 Figure 5). These two domains exhibited an extremely compact organization. For example, the  
377 *Arabidopsis* PLC possessed 129 amino acid residues of which 33 (25.6%) were devoted to the  
378 signal peptide and 95 (73.6%) to the copper binding motif (Figure 11). Second, a miR408  
379 recognition site was found near the 5' end of the coding region of all examined *PLC* transcripts  
380 (Figure 11), which has been experimentally validated in several plant species (Abdel-Ghany and  
381 Pilon, 2008; Zhou et al., 2010; Feng et al., 2013; Zhang and Li, 2013). Moreover, length and  
382 domain organization suggest that PLC in *Ginkgo* may resemble the prototype of this protein,  
383 which was further evolved in angiosperm by trimming the C-terminus to a bare-bones copper  
384 binding motif (Figure 11). Taken together, our results indicate that PLC has specifically evolved  
385 in seed plants as a miR408 targeted, storage vacuole associated compact cuproprotein, which  
386 balances GA and ABA levels for controlling germination (Figure 12).

387



## 388 **DISCUSSION**

389 The seeds are equipped with elaborate molecular mechanisms to monitor and transduce the light  
390 signals for proper germination, which is vital for survival of seed plants (Oh et al., 2004; Finch-  
391 Savage and Leubner-Metzger, 2006; Seo et al., 2009; Shi et al., 2015). Decades of research has  
392 shown that a decisive event downstream of light signaling is establishment of the high-GA-low-  
393 ABA hormonal state (Nambara and Marion-Poll, 2005; Oh et al., 2006; 2007; Yamaguchi, 2008;  
394 Seo et al., 2009; Shu et al., 2016). Elucidating how the light signals are converted into the  
395 hormonal profiles is critical to our understanding of seed biology, which bears immediate  
396 relevance to agriculture and human nutrition.

397

### 398 **A Long Repression Cascade Regulating Light Dependent Germination**

399 In this study, we used far-red light triggered, phyA dependent germination as the experiment  
400 model (Oh et al., 2004; 2006; Cho et al., 2012). Our comprehensive molecular and genetic  
401 analyses (Figure 1 to 7), incorporated to established light signaling framework (Castillon et al.,  
402 2007; Leivar and Quail, 2010), delineated the phyA-PIF1-miR408-PLC repression cascade as a  
403 key regulatory mechanism in germination (Figure 12). Through transcriptome profiling and  
404 quantification of endogenous GA and ABA levels, we found that this signal relay chain regulates  
405 the conversion of light signals into hormonal profiles (Figure 8 and 10). In darkness, absence of  
406 active phyA leads to PIF1 accumulation (Shen et al., 2008), which suppresses transcription of  
407 *MIR408* (Figure 6). Low level of miR408 in turn allows PLC to accumulate in the storage  
408 vacuole (Figure 1 and 4), which correlates with the low-GA-high-ABA state (Figure 9 and 10).  
409 Upon far-red irradiation, phyA is activated to rapidly destabilize PIF1 (Oh et al., 2007; Shen et  
410 al., 2008), releasing *MIR408* from transcriptional inhibition (Figure 6). Accumulation of miR408  
411 then leads to *PLC* silencing (Figure 1 and 4), which correlates with the high-GA-low-ABA state  
412 (Figure 9 and 10). This chain of events forms a multistep repressor cascade typical for  
413 developmental transcription networks, which generates robust temporal delay (Rosenfeld and  
414 Alon, 2003; Shoval and Alon, 2010). The phyA-PIF1-miR408-PLC repression cascade therefore  
415 may help to specify the time from light perception to PLC turnover.

416 Based on phylogenetic findings, the phyA-PIF1-miR408-PLC cascade appears to have  
417 formed by sequentially adding downstream components during evolution of the seed plants. The  
418 phytochrome signaling pathway and the PIF family were shown to originate in the ancestors of

419 charophytes (Han et al., 2019). Inhibition of PIFs by phytochromes to regulate light responses  
420 was conserved at least in vascular plants and the liverworts (Lee and Choi, 2017; Han et al.,  
421 2019). On the other hand, miR408 is deeply conserved in land plants including moss (Pan et al.,  
422 2018; Guo et al., 2020) while PLC acquired the miR408 recognition site after the emergence of  
423 seed plants (Figure 11). These observations suggest that the repression cascade has specifically  
424 evolved in seed plants, taking advantage of extant regulatory modules, for controlling seed  
425 germination.

426 HY5 and PIFs are known to function antagonistically to adjust the expression of common  
427 target genes related to biological processes such as seedling establishment, photosynthetic  
428 pigment synthesis, production of reactive oxygen species, and phosphate starvation response  
429 (Chen et al., 2013; Toledo-Ortiz et al., 2014; Sakuraba et al., 2018; Shi et al., 2018). We reported  
430 previously that HY5 binds to the G-box in the *MIR408* promoter and promotes miR408  
431 accumulation in young seedlings in a light intensity dependent manner (Zhang et al., 2014). The  
432 discovery of PIF1 represses *MIR408* transcription via binding to the G-box (Figure 6) indicates  
433 that PIF1 and HY5 reciprocally and sequentially control miR408 accumulation before and after  
434 germination (Figure 12). This circuit may form a switch for optimizing germination and the  
435 ensued post-germinative growth in light (Figure 12).

436

### 437 **PLC Links Copper Mobilization to Hormone Metabolism**

438 PLC belongs to the phytoeyanin family of small blue copper proteins, which are ancient copper-  
439 containing redox proteins widely distributed in microorganisms and plants (Rydén and Hunt  
440 1993; Guss et al., 1998; De Rienzo et al. 2000; Giri et al. 2004). Different from other  
441 phytoeyanins, PLCs are extremely compact with the 120-130 amino acid residues devoting to  
442 three conserved motifs. Besides the characteristic type-I copper binding motif on the C-terminus,  
443 the signal peptide and the miR408 recognition site superimpose on the N-terminus (Figure 11;  
444 Supplemental Figure 5). Our results provided two important clues to PLC function. First, through  
445 quantification of endogenous hormones, genetic analysis, gene expression profiling, and  
446 pharmacological analyses (Figure 8 to 10), we demonstrated that PLC acts as a switch  
447 downstream of PIF1 and is both necessary and sufficient to reciprocally modulate GA and ABA  
448 levels in the seed. Previously, high expression of *PLC* in the transmitting tract of the pistil was  
449 noticed (Dong et al. 2005). Over-expression of *PLC* was found to disrupt pollen tube guidance

450 into the style and to reduce seed set (Dong et al. 2005). The latter was corroborated by  
451 observations that over-expression of miR408 resulted in larger seed size and higher grain yield  
452 (Pan et al., 2018). Thus, besides seed germination, PLC may participate in other aspects of seed  
453 biology and reproductive development. It will be interesting to test if rebalancing endogenous  
454 hormone levels is the unifying function of PLC in these processes.

455       Second, through RNA-sequencing, we found that *PLC* is both necessary and sufficient to  
456 regulate an overwhelming portion of the *PIF1*-dependent transcriptome underlying germination  
457 (Figure 8; Supplemental Figure 3; Supplemental Dataset 1). This finding suggest that PLC  
458 turnover is associated with major changes to cellular state. Because PLC is a vacuole located  
459 cuproprotein with a bare-bones type-I copper motif and highly expressed in mature seed (Figure  
460 1 and 11), we contemplated that PLC is a key carrier for copper mobilization. In the seed,  
461 mineral nutrients are sequestered in the storage vacuoles (Lanquar et al., 2005; Kim et al., 2006;  
462 Roschztardt et al., 2009; Eroglu et al., 2017). Right after imbibition, there likely is no new  
463 assimilation of transition metals before massive translation and protein synthesis is taking place  
464 (Née et al., 2017; Paszkiewicz et al., 2017). Thus, mineral elements need to be mobilized from  
465 vacuolar stores and transported to the cytoplasm and other organelles for reconstituting  
466 biochemical activity. Disrupting these processes has been shown to lead to severe germination  
467 defects (Lanquar et al., 2005; Kim et al., 2006). Previously we have shown that miR408  
468 promotes copper allocation to the plastid and enhances photosynthesis via elevating plastocyanin  
469 abundance (Zhang et al., 2014; Pan et al., 2018). Taken together, we speculate that the miR408-  
470 *PLC* module controls copper redistribution between the vacuole and the plastid.

471

### 472 **How Does PLC Regulate GA and ABA Biosynthesis?**

473 PLC turnover as a means for copper mobilization and delivery to the plastid is consistent with  
474 previous studies on the effects of copper on plastid physiology and biochemistry. Plastid is  
475 known to be the major cellular copper sink in plants (Burkhead et al., 2009), whereby the  
476 transition metal acts as cofactor for plastocyanin in the thylakoid lumen, which is indispensable  
477 as an electron carrier in the Z-scheme of photosynthesis (Molina-Heredia et al., 2003; Weigel et  
478 al., 2003), and for the copper- and zinc-containing superoxide dismutase in the stroma, which  
479 participates in neutralizing reactive oxygen species to maintain proper redox state in the plastid  
480 (Gupta et al., 1993). Copper allocation to the plastid was shown to be critical for plastocyanin

481 abundance and activity (Weigel et al., 2003; Zhang et al., 2014; Pan et al., 2018). Copper level  
482 was also reported to impact the number of chloroplasts per cell, thylakoid stacking, and grana  
483 size (Bernala et al., 2006). It is intriguing to note that GA biosynthesis initiates in the plastid  
484 (Sun and Kamiya 1997; Yamaguchi, 2008). Thus, regulated PLC degradation may promote  
485 copper translocation or allocation to the plastid. Copper-propelled plastid development may in  
486 turn provide the structural and biochemical niche for initiating GA biosynthesis in the seed.

487         Alternatively, the effect of PLC turnover on hormone rebalancing may be explained by a  
488 direct impact on ABA synthesis taking place in the cytosol. In *Arabidopsis*, AAO3 encodes an  
489 aldehyde oxidase that catalyzes the last step of ABA biosynthesis, the conversion of abscisic  
490 aldehyde to ABA (Seo et al., 2000). AAO3 is a cytosolic molybdoenzyme that requires the  
491 molybdenum cofactor for catalytic activity (Seo et al., 2000). Structural and biochemical  
492 analyses have shown that the final step of molybdenum cofactor biosynthesis is dependent on a  
493 copper-dithiolate complex, which protects the reactive dithiolate before molybdenum insertion  
494 (Kuper et al., 2004). It could be speculated that PLC is one of the copper donors, through  
495 unidentified cytoplasmic chaperones, passes on copper to the dithiolate group for synthesizing  
496 the molybdenum cofactor (Peñarrubia et al., 2015). Induction of *PLC* expression during late seed  
497 development (Figure 1) is consistent with this scenario whereby elevated PLC helps to maintain  
498 AAO3 activity and hence ABA accumulation during seed maturation. Upon light irradiation,  
499 rapid PLC turnover would deplete copper supply for AAO3 and impede ABA synthesis, which is  
500 consistent with the fourfold decline of ABA content in the *plc* seed over the wild type (Figure  
501 10C). The finding in rice that exogenous copper increases ABA accumulation and inhibits  
502 germination (Ye et al., 2014) provides another line of evidence for this model. Further studying  
503 PLC-related copper homeostasis could shed more light on hormone synthesis and balancing  
504 during seed development and germination.

505

## 506 METHODS

### 507 Plant Materials and Growth Conditions

508 The wild type *Arabidopsis thaliana* used in this study was Col-0. The *pif1*, *PIF1-OX*,  
509 *pMIR408:GUS*, *miR408-OX*, and *amiR408* plants were as previously described (Oh et al., 2004;  
510 Zhang and Li, 2013; Zhang et al., 2014). To delete *PLC*, a CRISPR/Cas9 system employing the  
511 modified pCAMBIA1300 vector was used (Mao et al., 2013) in which the *35S* and the *AtU6-26*  
512 promoter respectively drive *Cas9* and a pair of sgRNAs that were designed to target both ends of  
513 the *PLC* coding region. The resulting construct was used to transform the wild type and T<sub>1</sub> plants  
514 were individually genotyped by PCR and sequencing to identify deletion events. Approximately  
515 100 individual T<sub>2</sub> plants were genotyped to identify *Cas9*-free homozygous *plc-2* lines. The  
516 *iPLC-OX* transgenic plants were obtained by cloning the *PLC* coding sequence into the pER8  
517 vector (Zuo et al., 2000) and transforming wild type plants. Homozygotes were selected for  
518 Hygromycin resistance in the T<sub>2</sub> population. The *pPLC:PLC-GFP* transgenic plants were  
519 obtained by cloning the *PLC* coding sequence into the modified pJim19-GFP vector and  
520 substituting the *PLC* promoter for the *35S* promoter. Following transformation of the wild type  
521 plants, homozygotes were selected by Kanamycin resistance in the T<sub>2</sub> population. Sequences of  
522 the relevant primers are listed in Supplemental Table 1. The *pMIR408:GUS/pif1*, *PIF1-OX*  
523 *miR408-OX*, *pif1 amiR408*, *PIF1-OX plc*, *lac12 lac13*, and *plc lac12 lac13* lines were generated  
524 by crossing and selection for homozygotes at the F<sub>2</sub> generation.

525 Adult *Arabidopsis* plants were grown in soil at 22°C, ~60% relative humidity, and under  
526 long day (16 h light/8 h dark) condition in a growth chamber. For each experiment, the seeds  
527 were harvested at approximately the same time. After harvesting, the seeds were dried at room  
528 temperature for six to eight weeks prior to germination and other experiments.

529

### 530 Germination Assays

531 The far-red light induced germination assay was performed as described with minor  
532 modifications (Oh et al., 2004). Briefly, a triplicate set of 50-75 seeds for each sample was  
533 surface sterilized with liquid bleach and plated on half-strength MS aqueous agar medium (0.6%  
534 agar, 1% sucrose, pH 5.7). One hour after the start of sterilization, the plated seeds were  
535 irradiated with 3.2  $\mu\text{M m}^{-2} \text{s}^{-1}$  far-red light for 5 min and then incubated in the dark for 48 h. For  
536 phyA<sub>OFF</sub>, the imbibed seeds were continuously placed in darkness for up to 120 h. For phyA<sub>ON</sub>,

537 the seeds were treated with a second far-red irradiation for 4 h and then in darkness for up to 120  
538 h. For pharmacological analysis, 100  $\mu\text{M}$  paclobutrazol, 10  $\mu\text{M}$  GA<sub>3</sub>, or 5  $\mu\text{M}$  ABA (Sigma-  
539 Aldrich) was supplemented to the medium. Germination was determined by examining radicle  
540 formation at the indicated time points.

541

### 542 **Analysis of Seedling Greening**

543 The seedlings were grown in dark for four days and then transferred to continuous white light  
544 ( $100 \mu\text{M m}^{-2} \text{s}^{-1}$ ) for 24 h. The greening rate was determined and calculated as the ratio of green  
545 seedlings over the total germinated seedlings as previously described (Zhong et al., 2009).  
546 Pigments were extracted from etiolated seedlings in the dark at room temperature using 90%  
547 acetone containing 0.1% NH<sub>3</sub> as previously described (Zhong et al., 2014). Supernatants  
548 containing the pigments were subject to fluorescence spectral analysis using an Infinite M200  
549 microplate reader (Tecan). The excitation wavelength was 443 nm and the emission spectra were  
550 recorded from 610 to 740 nm with 1 nm bandwidth. All measurements were performed on at  
551 least three independent biological samples and one representative set of results was shown.

552

### 553 **Transcript Quantification**

554 Total RNA from imbibed seeds was isolated using the Quick RNA Isolation Kit (Huayueyang).  
555 For each experiment, mRNA and miRNA from three independent biological samples were  
556 reverse transcribed into cDNA using the PrimeScript II 1<sup>st</sup> Strand cDNA Synthesis Kit (TaKaRa)  
557 and the miRcute Plus miRNA First-Strand cDNA Synthesis Kit (Tiangen), respectively. qPCR  
558 was performed using SYBR Green Mix (TaKaRa) on the 7500 Fast Real-Time PCR System  
559 (Applied Biosystems). *Actin7* and 5S RNA were used for mRNA and miRNA normalization,  
560 respectively. Sequences of the primers are listed in Supplemental Table 1.

561

### 562 **RNA-sequencing Analysis**

563 Seeds of the wild type, *miR408-OX* and *pif1* were grown on half-strength MS medium. The  
564 *iPLC-OX* seed grown on medium supplemented with or without 5  $\mu\text{M}$   $\beta$ -estradiol (Sigma-  
565 Aldrich). All seeds were treated with the phyA<sub>OFF</sub> condition for 12 h before sample collection.  
566 Total RNA was isolated using the Quick RNA Isolation Kit (Huayueyang). Library preparation  
567 and RNA-sequencing were performed on the Illumina HiSeq 2000 platform. For each genotype,



568 three paired-end libraries from independent biological samples were prepared. At least 16  
569 million raw paired-end reads were generated from each library. Quality control was conducted  
570 using fastQC. Cutadapt and a custom Perl script were used to trim adaptors with the parameter  
571 Q30 and the first nine bases following the adaptors with low fastQC score. After trimming, only  
572 reads longer than 100 bases were retained and the R1 and R2 files were paired simultaneously.  
573 The clean reads were mapped to the TAIR10 *Arabidopsis* genome build using STAR with an  
574 average mapping rate of ~90% and unique mapping rate above 80%. Transcript quantification  
575 results generated by Stringtie were processed by Cuffdiff to identify differentially expressed  
576 genes. Clustering and correlation analyses were performed and visualized using R scripts. GO  
577 analysis was carried out using AgriGO (<http://bioinfo.cau.edu.cn/agriGO/>).

578

### 579 **ChIP-qPCR**

580 ChIP was carried out on four-day-old dark-grown *PIF1-OX* and wild type seedlings on MS  
581 medium using an anti-MYC polyclonal antibody (Sigma-Aldrich) as described (Pfeiffer et al.,  
582 2014). After ChIP, equal amount of input DNA was subjected to qPCR analysis of the target  
583 DNA fragment. Fold of enrichment was calculated between *PIF1-OX* and the wild type input.

584

### 585 **Immunoblotting**

586 The *pPLC:PLC-GFP* line was used for protein analysis. Dry seed was incubated in water at  
587 room temperature for 0.5 h or at 4°C for 24 h before sample collection. Total protein was  
588 isolated with an extraction buffer containing 50 mM Tris·HCl, pH 7.5, 6 mM NaCl, 1 mM  
589 MgCl<sub>2</sub>, 1 mM PMSF, and 1× protease inhibitor mixture (Roche). Immunoblotting was performed  
590 with an anti-GFP antibody (Abcam). An anti-RPT5 antibody (Abcam) was used as loading  
591 control.

592

### 593 **Histochemical Staining for GUS Activity**

594 After stripping away the seed coat in green safe light, *pMIR408:GUS* and *pMIR408:GUS/pif1*  
595 seeds grown for 12 h in phyA<sub>OFF</sub> and phyA<sub>ON</sub> were incubated in a standard GUS staining  
596 solution for 3 h at 37°C. Following removal of the staining solution, seeds were washed with  
597 several changes of 75% ethanol until pigments were no longer visible. Images of the GUS  
598 staining pattern were taken with a digital camera.



599

## 600 **Live-cell Imaging**

601 The *pPLC:PLC-GFP* seed was treated with phyA<sub>OFF</sub> and phyA<sub>ON</sub> for the indicated duration.  
602 Cotyledons were dissected away from the testa and endosperm by the application of gentle  
603 pressure to seed held between a microscope slide and a cover slip. Fluorescence images were  
604 obtained using a Nikon A1R si+ laser scanning confocal microscope equipped with an APO  
605 40×1.25 NA water immersion objective. Excitation and emission wavelengths were 488/500 to  
606 550 nm for GFP and 405/425 to 475 nm for vacuole autofluorescence. Autofluorescence spectra  
607 were obtained using a 32-PMT spectral detector. Spectral unmixing and image analysis were  
608 performed using the NIS Elements AR software (Nikon Instruments).

609 Transient expression in onion epidermal cells was performed as previously described  
610 (Wang and Frame, 2009). The gold particles were coated with plasmid DNA containing the  
611 expression cassette for PLC-GFP or COPT5-mCherry. The Biolistic PDS-1000/He Particle  
612 Delivery System (Bio-Rad) was used for bombarded with the following settings: 1,100 psi  
613 rupture disc, 25-26-inch Hg vacuum, and target distance of 10 cm. After bombardment, the  
614 explants were kept in dark at 25°C for 16-18 h and observed with the Nikon A1R si+ microscope.  
615 Excitation and emission wavelengths were 488/500 to 550 nm for GFP and 561/570 to 620 nm  
616 for mCherry.

617

## 618 **Quantification of Endogenous GA and ABA**

619 For each genotype, 500 mg of seed grown in phyA<sub>OFF</sub> for 24 h was collected and ground into  
620 fine powder in liquid nitrogen. Endogenous ABA was purified and measured as previously  
621 described (Fu et al. 2012) with minor modifications to the detection procedure. Briefly, UPLC-  
622 MS/MS analysis was performed on a UPLC system (Waters) coupled to the 5500 Qtrap system  
623 (AB SCIEX). Chromatography separation was achieved with a BEH C18 column (Waters) with  
624 mobile phase 0.05% HAc (A) and 0.05% HAc in ACN (B). The gradient was set initially with 20%  
625 B and increased to 70% B within 6 min. ABA was detected in the MRM mode with transition  
626 263/153 and the isotope dilution method was used for quantification.

627 Quantitative GA measurement was performed as previously described using UPLC-  
628 MS/MS (Ma et al., 2015). Chromatography separation was achieved with a BEH C18 column  
629 (Waters) with mobile phase 0.05% HAc (A) and 0.05% HAc in ACN (B). Gradient was set as

630 the following: 0-17 min, 3% B to 65% B; 17-18.5 min, 65% B to 90% B; 18.5-19.5min, 90% B;  
631 19.5-21 min, 90% B to 3% B; and 21-22.5 min, 3% B. GA<sub>4</sub> was detected in the negative MRM  
632 mode and quantified with a MRM transition. The source parameters were set as IS voltage -4500  
633 V, TEM 600°C, GS1 45, GS2 55, and curtain gas 28.

634

### 635 **Transient Expression in Tobacco Protoplasts**

636 The promoter sequence of *MIR408* was cloned from *Arabidopsis* genomic DNA, inserted into  
637 the pGreen II 0800-LUC vector (Hellens et al., 2005), and used as the reporter. The *PIF1* coding  
638 sequence was cloned from *Arabidopsis* cDNA, inserted into pGreen II 62-SK (Hellens et al.,  
639 2005), and used as the effector. Tobacco protoplasts were freshly prepared as described  
640 previously (Yoo et al., 2007). The effector or the empty vector was combined with the report  
641 construct and used to transiently transform the protoplasts using the Dual-Luciferase Reporter  
642 System (Promega), following the manufacturer's instruction. Transfected protoplasts were  
643 incubated under low light for 16 h. The chemiluminescence was determined using a LB942  
644 Multimode Reader (Berthold Technologies).

645

### 646 **Domain and Phylogenetic Analyses of PLC**

647 PLC in *Arabidopsis* was used as query to perform a BLASTP search against all proteins in 52  
648 plant species covering all main clades of land plants. A total of 276 PLC sequences were  
649 identified based on two criteria: E-value  $\leq e^{-10}$  and a "plantacyanin" annotation term assigned by  
650 InterProScan. N-terminal signal peptide was predicted using SignalP (Almagro Armenteros et al.,  
651 2019). Binding site for miR408 was predicted using psRNATarget (Dai et al., 2018). To show  
652 the evolutionary trajectory, PLCs from 14 representative plant species and the most homologous  
653 genes encoding small blue copper proteins from *Physcomitrella patens*, *Salvinia cucullate*, and  
654 *Azolla filiculoides* were selected and mapped to a species tree obtained from TimeTree  
655 (<http://www.timetree.org/>).

656 **Supplemental Data**

- 657 Supplemental Figure 1. Generation and Characterization of *PLC*-related Mutants.
- 658 Supplemental Figure 2. The miR408-*PLC* Module Specifically Regulates Germination.
- 659 Supplemental Figure 3. Enriched GO Terms Associated with *PIF1* and *PLC* Coregulated Genes.
- 660 Supplemental Figure 4. Exemplar Genes Regulated by the *PIF1-PLC* Pathway.
- 661 Supplemental Figure 5. PLC Has a Compact Domain Organization.
- 662 Supplemental Table 1. Oligonucleotide Sequences of the Primers Used in This Study.
- 663 Supplemental Dataset 1. List of *PIF1* and *PLC* Coregulated Genes.
- 664 Supplemental Dataset 2. Expression Profile of 218 Germination Related Genes.

665 **Accession Number**

666 Sequence data from this article can be found in the *Arabidopsis* Genome Initiative or  
667 GenBank/EMBL databases under the following accession numbers: *MIR408* (At2g47015), *PIF1*  
668 (AT2g20180), *HY5* (At5g11206), *PLC* (At2g02850), *LAC3* (At2g30210), *LAC12* (At5g05390),  
669 *LAC13* (At5g07130), *GA2ox8* (At4g21200), *GA3ox1* (At1g15550), *GA2ox2* (At1g30040), *ABAI*  
670 (At5g67030), *NCED6* (At3g24220), *NCED9* (At1g78390), *SOM* (At1g03790), *RVE2*  
671 (At5g37260), *JMJ22* (At5g06550) and *MAN7* (At5g66460). T-DNA insertion mutants used are  
672 *pif1* (SALK\_072677), *plc-1* (SALK\_091945), *lac3* (SALK\_031901C), *lac12* (SALK\_087122),  
673 and *lac13* (SALK\_023935). RNA sequencing data can be found at the National Center for  
674 Biotechnology Information Sequence Read Archive under accession number PRJNA633227.

675

676 **Author Contributions**

677 L.L. designed and supervised the research. A.J., J.P., Y.Z., D.Z., and C.H. performed the  
678 experiments. Z.G. (Guo), Z.G. (Gao), and S.Z. analyzed the data. P.X. and J.C quantified  
679 hormone levels. A.J. and L.L. wrote the paper.

680

681 **Acknowledgements**

682 We thank Drs. Xiangdong Fu, Xing-Wang Deng, and Hongwei Guo for providing some of the  
683 plasmids and seeds used in this study. This work was supported by grants from the National Key  
684 Research and Development Program of China (2017YFA0503800) and the National Natural  
685 Science Foundation of China (31621001).

686

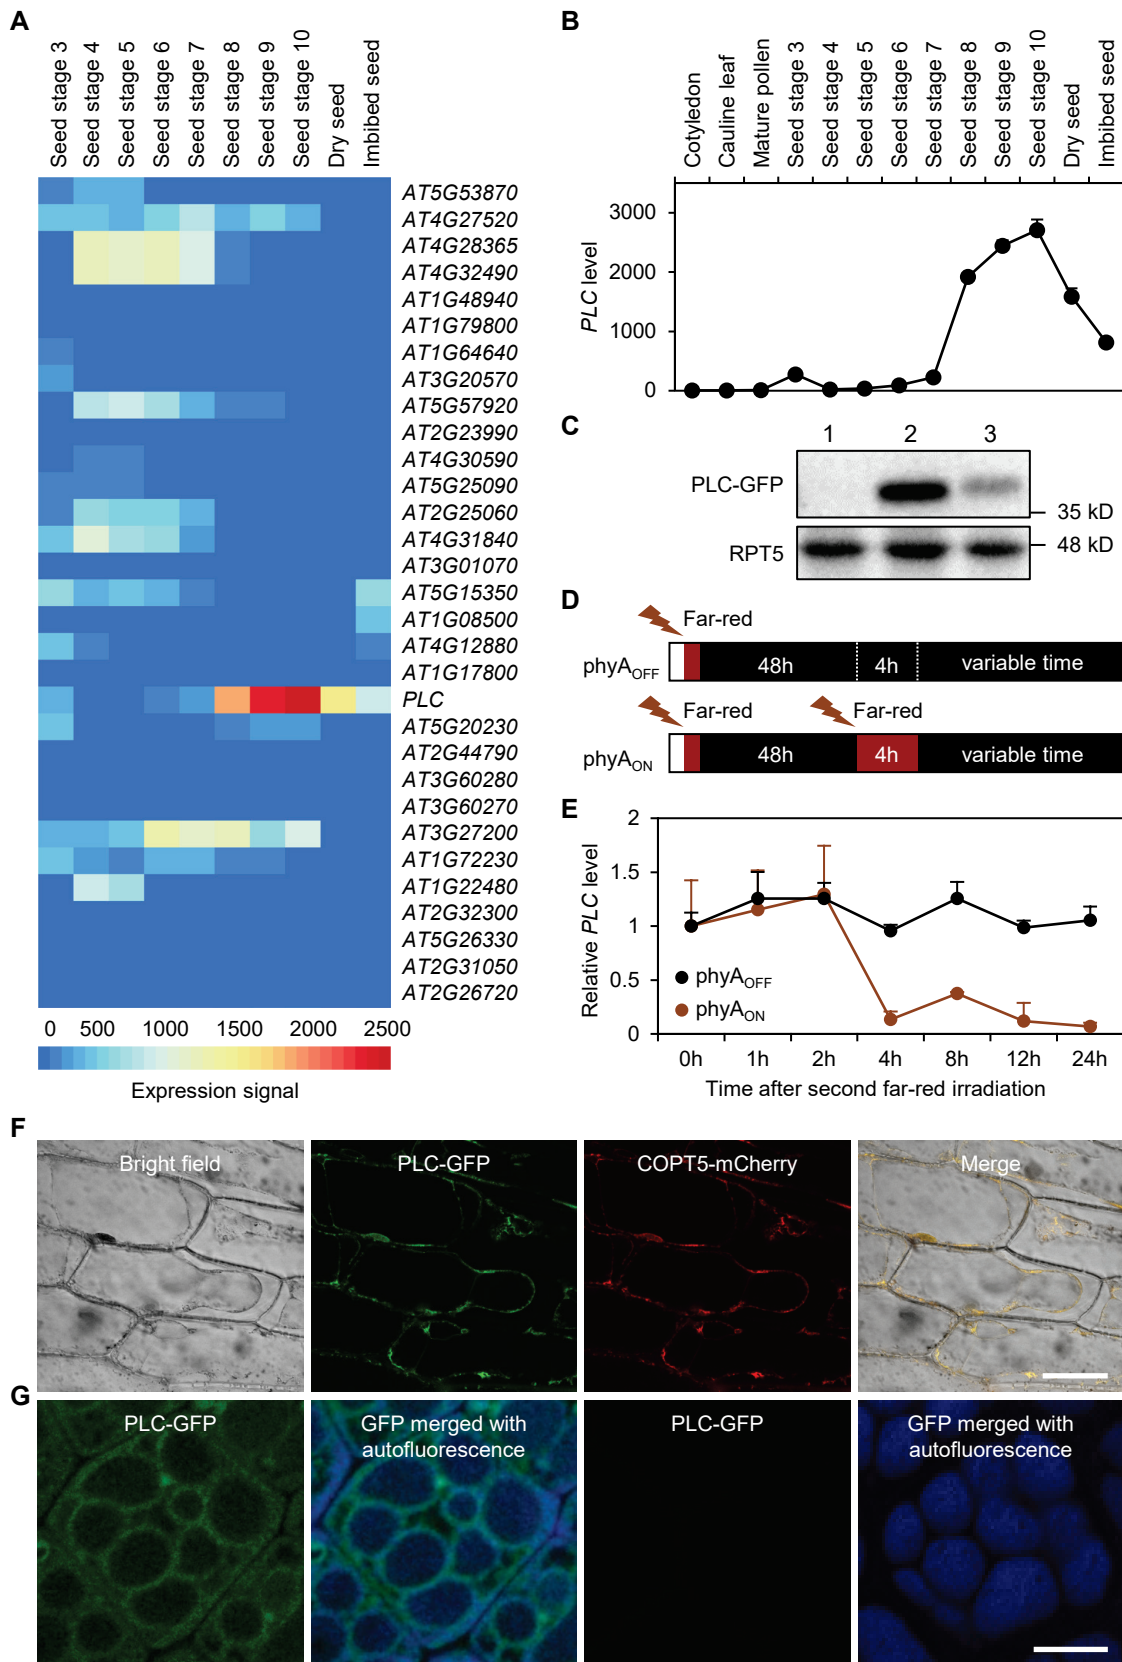

**Figure 1. PLC Is Induced during Seed Development and Rapidly Silenced during Germination.**

**Figure 1. PLC Is Induced during Seed Development and Rapidly Silenced during Germination.**

(A) Global expression profile of 31 phytoeyanin genes in the seed based on data in the *Arabidopsis* eFP Browser. (B) Comparison of *PLC* expression pattern in the seed and other organs, using data from the eFP Browser. (C) Detection of PLC-GFP in *pPLC:PLC-GFP* plants using an anti-GFP antibody. 1, seedling; 2, dry seed; 3, vernalized seed. Size markers are indicated on the right. RPT5 was used as the loading control. (D) Diagram illustrating the phyA<sub>OFF</sub> and phyA<sub>ON</sub> regimes in which imbibed seeds were sequentially treated with the indicated light conditions. (E) Relative *PLC* transcript level during the time course of phyA<sub>OFF</sub> and phyA<sub>ON</sub> determined by RT-qPCR analysis. Data are mean  $\pm$  SD (n = 3). (F) Subcellular localization of PLC. PLC-GFP and COPT5-mCherry were transiently expressed in the same onion epidermal cells and examined by confocal fluorescence microscopy. (G) Co-localization of GFP fluorescence with vacuole autofluorescence in cotyledon cells of imbibed *pPLC:PLC-GFP* seed in phyA<sub>OFF</sub> (left two panels) and phyA<sub>ON</sub> (right two panels). Bars, 10  $\mu$ m.

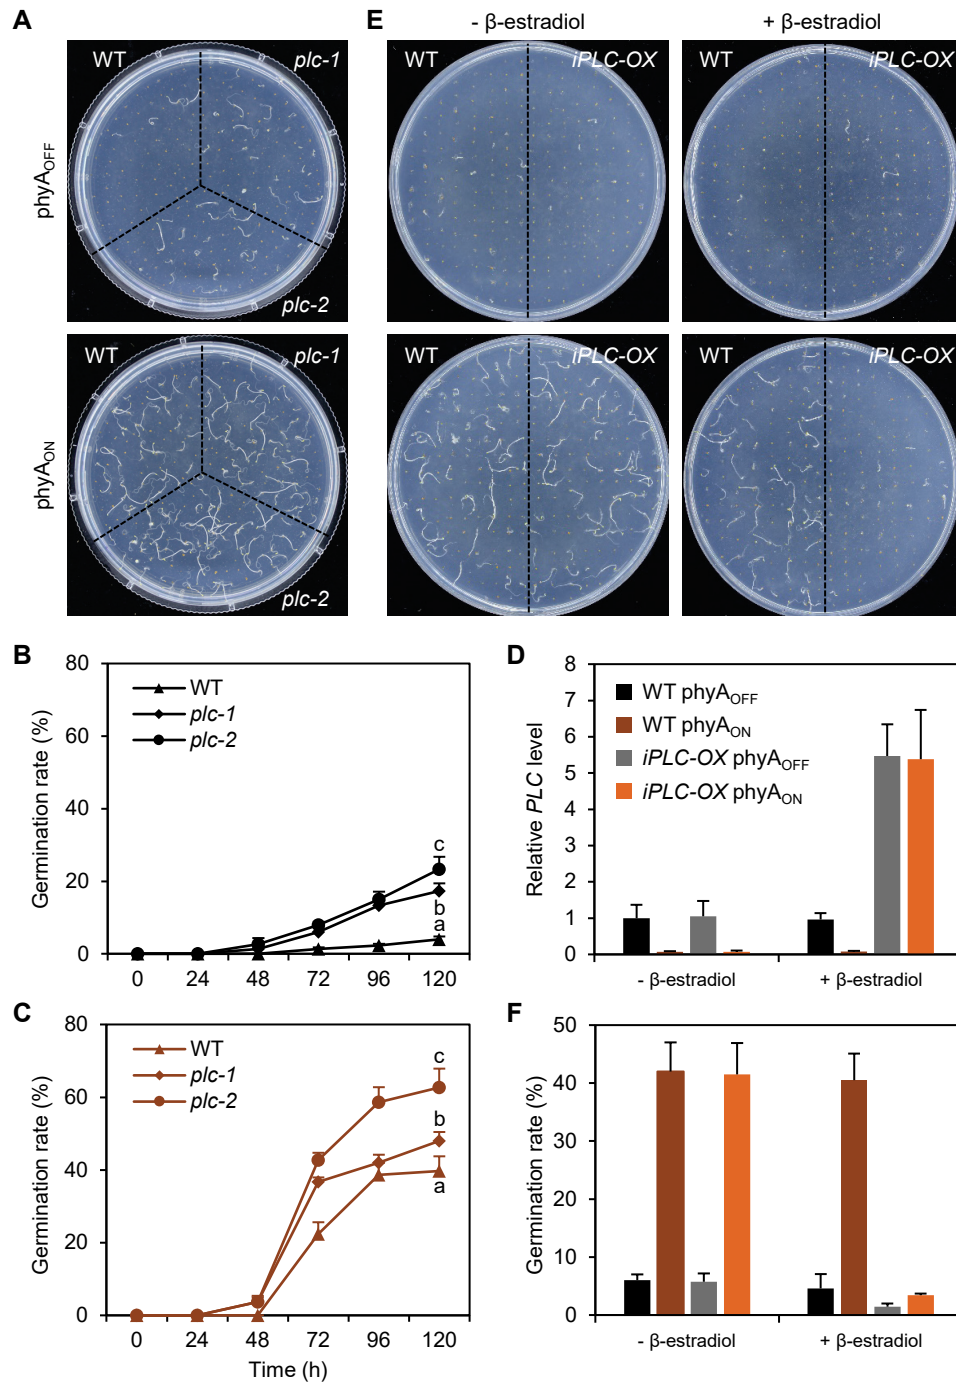

**Figure 2. PLC Negatively Regulates Germination.**

(A) Representative plates showing germination state of the wild type and *plc* seeds in phyA<sub>OFF</sub> (top) and phyA<sub>ON</sub> (bottom). (B-C) Quantification of the germination rate over the time course of phyA<sub>OFF</sub> (B) and phyA<sub>ON</sub> (C). Data are mean  $\pm$  SD (n = 3). Different letters represent genotypes with significant differences at 120 h (ANOVA,  $p < 0.05$ ). (D) RT-qPCR analysis of relative *PLC* transcript level in the indicated genotypes without and with the application of  $\beta$ -estradiol. Data are mean  $\pm$  SD (n = 3). (E) Representative plates showing germination state of the wild type and *iPLC-OX* seeds in phyA<sub>OFF</sub> and phyA<sub>ON</sub> under the indicated treatments. (F) Quantification of germination rates of the wild type and *iPLC-OX* seeds. Data are mean  $\pm$  SD (n = 3).



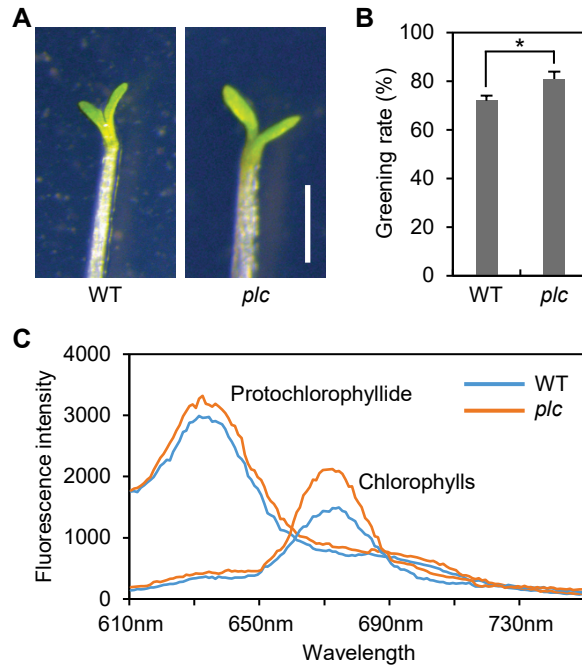

**Figure 3. PLC Negatively Regulates Seedling Greening.**

(A) Representative wild type and *plc* seedlings that were grown in the dark for 96 h and then exposed to continuous white light for 24 h. Bar, 1 mm. (B) Quantified greening rate. Data are mean  $\pm$  SD ( $n = 50$ ). \*,  $p < 0.05$  by Student's *t* test. (C) Comparison of pigment profile in the *plc* and wild type seedlings. Etiolated seedlings grown in the dark for 96 h were assayed for protochlorophyllide by spectral analysis. Chlorophylls were assayed in etiolated seedlings exposed to white light for 24 h.



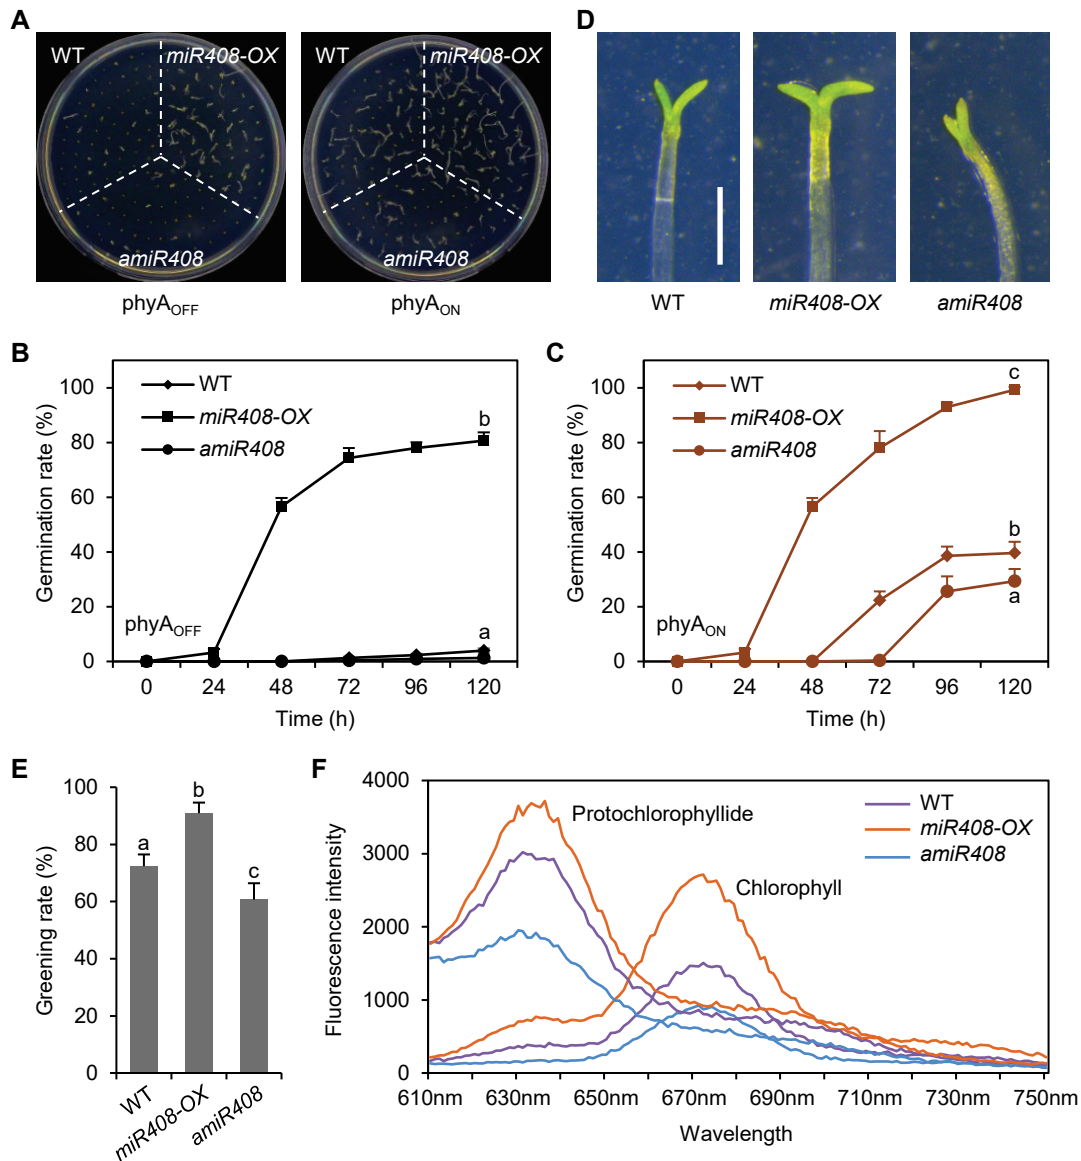

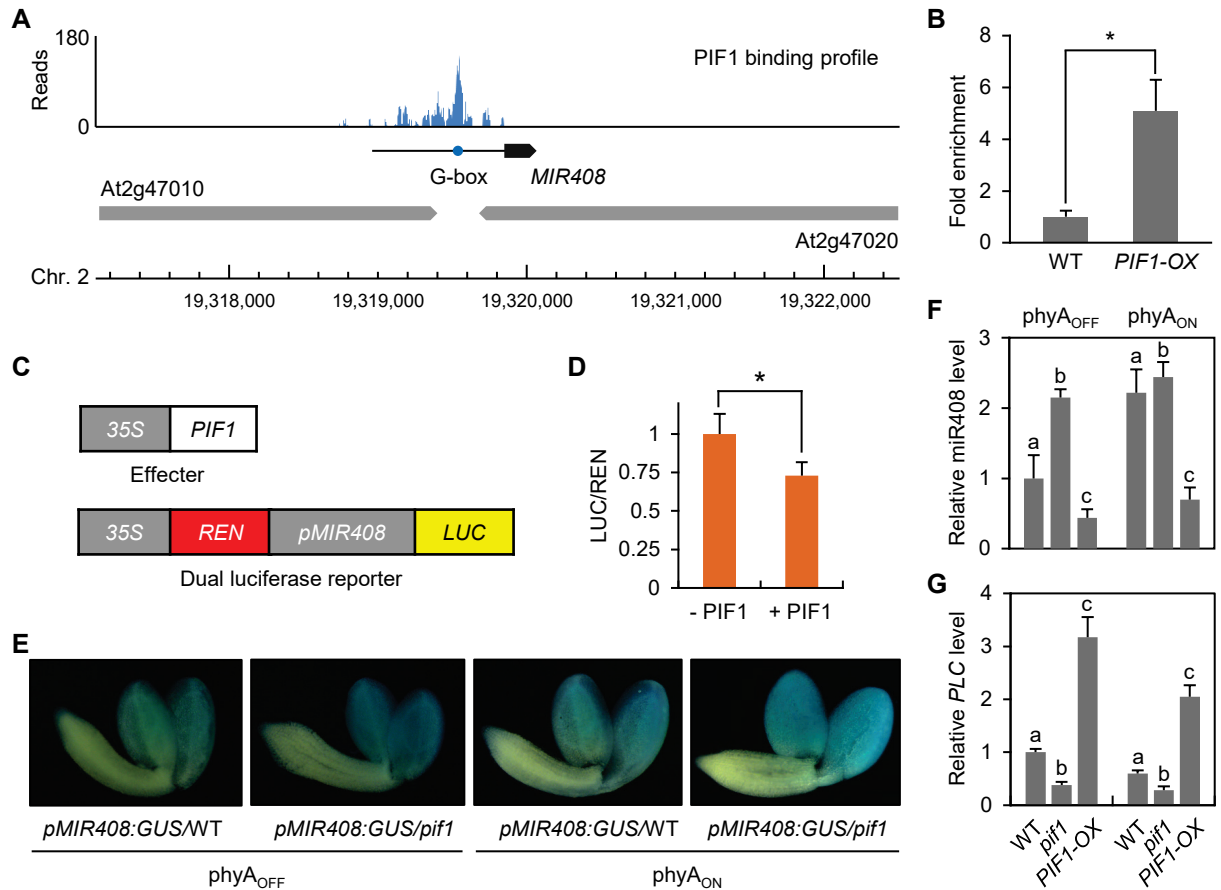

**Figure 6. PIF1 Suppresses miR408 Expression by Binding to the *MIR408* Promoter.**

(A) PIF1 occupancy profile at the *MIR408* locus. Significantly enriched PIF1 ChIP-seq reads were obtained from Pfeiffer et al. (2014) and mapped onto the *Arabidopsis* genome coordinates. Loci are represented by block arrows. The blue circle marks the G-box (CACGTG) in the *MIR408* promoter (horizontal line). (B) ChIP-qPCR confirming PIF1 binding to the *MIR408* promoter. An anti-MYC antibody was used to precipitate chromatin from *PIF1-OX* and wild type seeds. Enrichment of PIF1 binding was determined by qPCR analysis. Data are mean  $\pm$  SD ( $n = 3$ ). \*,  $p < 0.05$  by Student's *t* test. (C) Transient dual luciferase assay showing PIF1 repression of *MIR408*. The *pMIR408:LUC* reporter concatenated to 35S:*REN* was used to transform tobacco protoplasts with either the empty vector (- PIF1) or a PIF1-expressing construct (+ PIF1). (D) Quantification of the LUC/REN luminescence ratio. Data are mean  $\pm$  SD ( $n = 3$ ). \*,  $p < 0.05$  by Student's *t* test. (E) Comparison of GUS activity in transgenic seed expressing *pMIR408:GUS* in the wild type or *pif1* background in *phyA<sub>OFF</sub>* and *phyA<sub>ON</sub>*. Bar, 500  $\mu$ m. (F-G) RT-qPCR analysis of relative *miR408* (F) and *PLC* (G) transcript levels. Data are mean  $\pm$  SD ( $n = 3$ ). Different letters denote genotypes with significant differences (ANOVA,  $p < 0.05$ ).

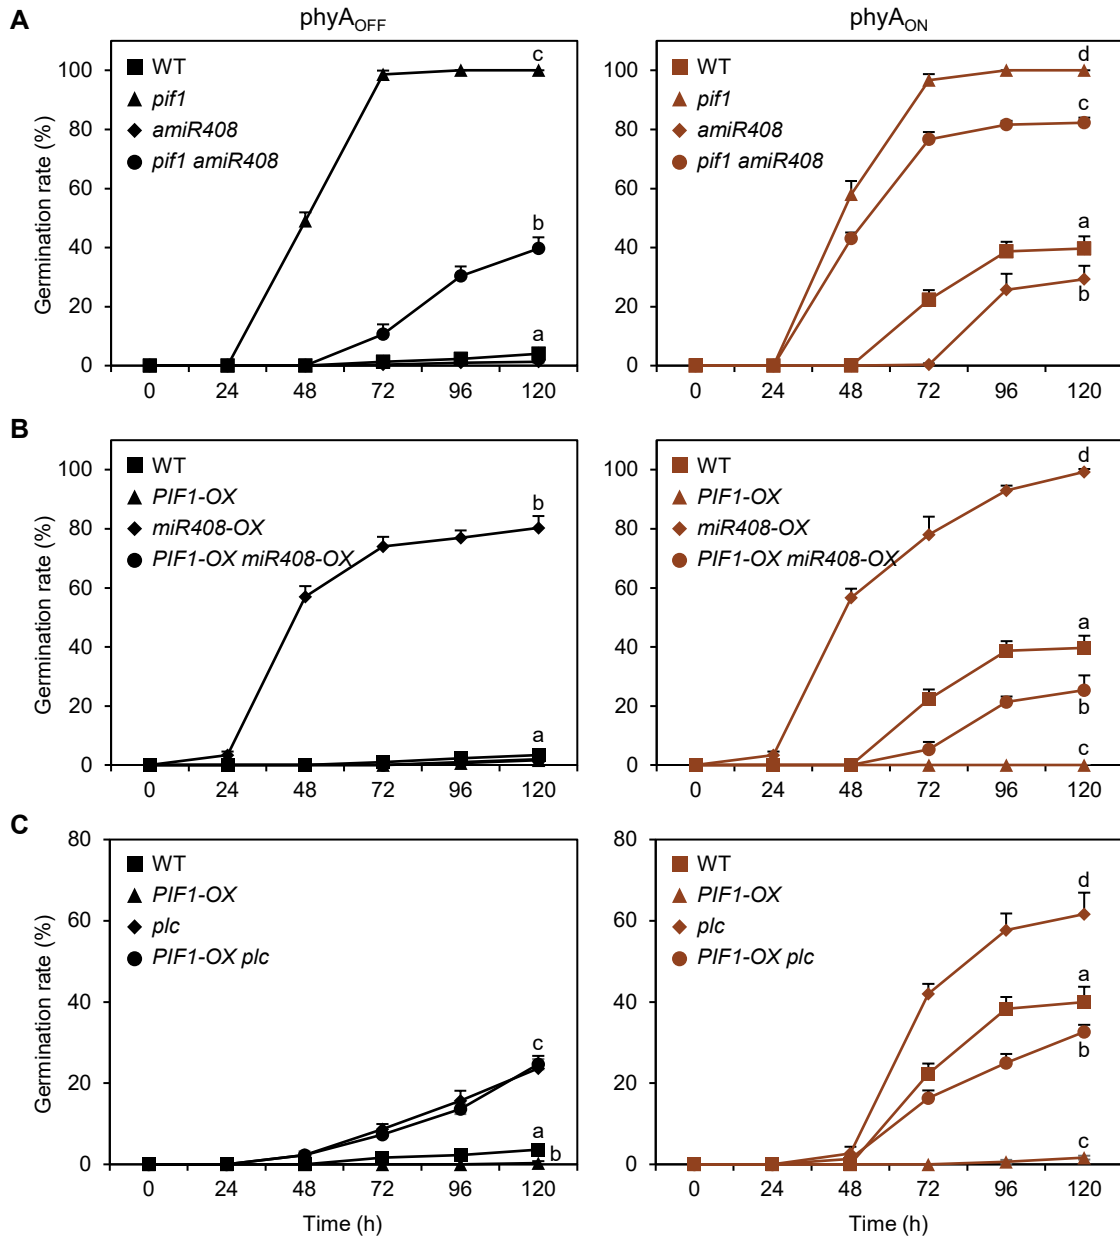

**Figure 7. Genetic Analysis of the PIF1-MIR408-PLC Pathway.**

(A) The *amiR408* line was crossed with *pif1* to generate the *pif1 amiR408* double mutant. Seeds from these lines and the wild type were assayed for germination rates over the time course of *phyA<sub>OFF</sub>* (left) and *phyA<sub>ON</sub>* (right). (B) The *miR408-OX* line was crossed with *PIF1-OX* to generate the *PIF1-OX miR408-OX* double over-expression line. Seeds from these lines and the wild type were assayed for germination rates in *phyA<sub>OFF</sub>* and *phyA<sub>ON</sub>*. (C) Comparison of germination rates of the *PIF1-OX*, *plc*, and *PIF1-OX plc* seeds. Data are all means  $\pm$  SD ( $n = 3$ ). Different letters denote genotypes with significant differences at 120 h (ANOVA,  $p < 0.05$ ).

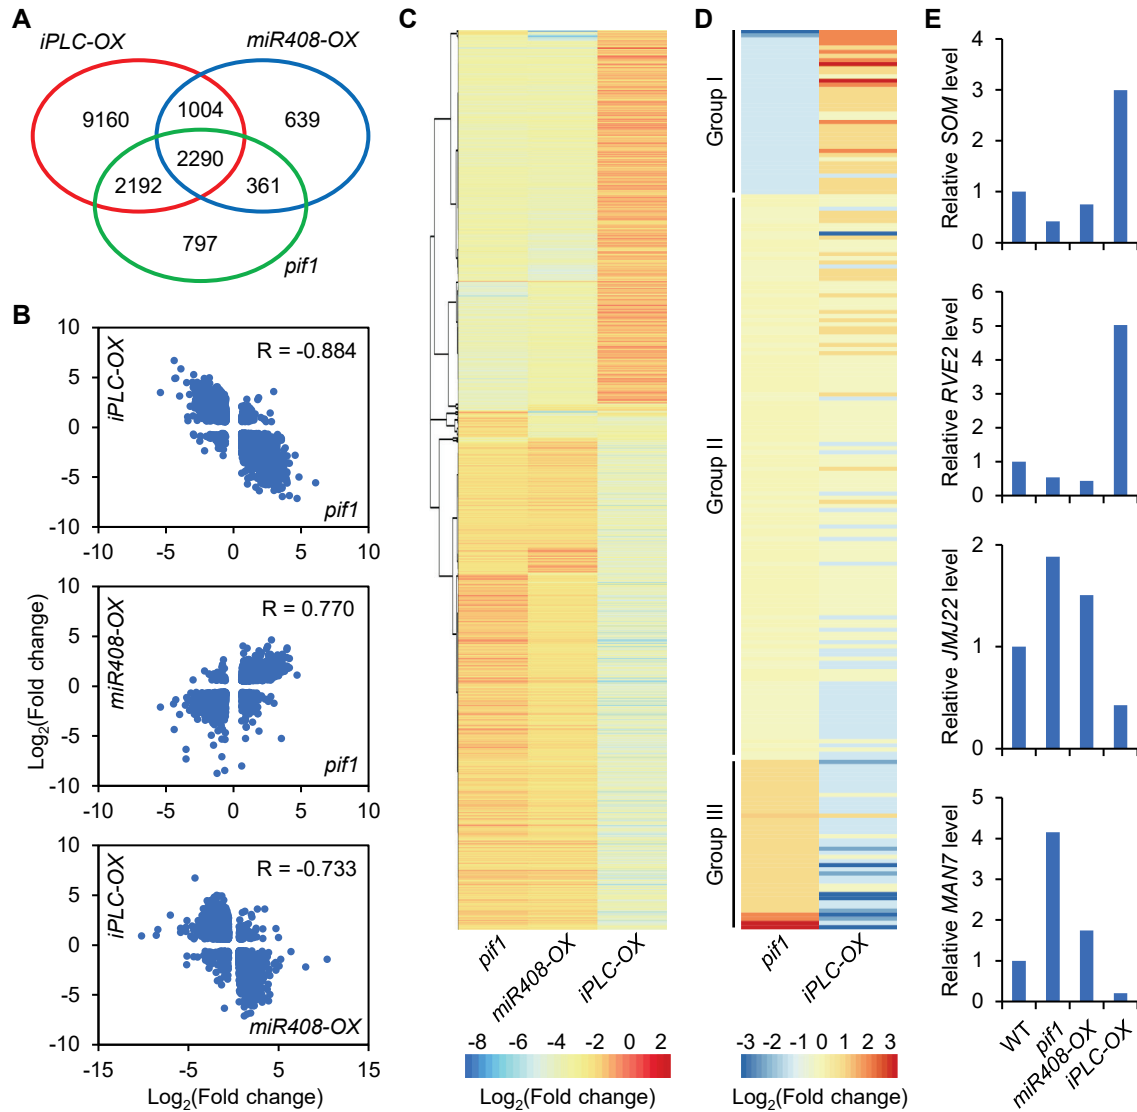

**Figure 8. Transcriptomic Analysis of the PIF1-MIR408-PLC Pathway.**

(A) Venn diagram showing the relationships of *PIF1*, *MIR408*, and *PLC* regulated genes. Differentially expressed genes were identified from RNA-sequencing analysis of *pif1*, *miR408-OX*, and *iPLC-OX* seeds against the respective controls. (B) Scatterplots showing pairwise correlation of the relative expression levels of the three sets of coregulated genes in *pif1*, *miR408-OX*, and *iPLC-OX* against the respective controls. R, Pearson correlation coefficient. (C) Hierarchical clustering of the 2,290 genes differentially expressed in *pif1*, *miR408-OX*, and *iPLC-OX* against the respective controls. Colors represent the  $\text{Log}_2$  transformed fold change. (D) Clustering analysis of the 218 genes associated with the GO term “seed germination” (GO:0009845). The genes were divided in three grouped based relative expression level in *pif1* against the wild type. Group I, repressed in *pif1*; Group II, not differentially expressed; Group III, induced in *pif1*. (E) Expression pattern of representative Group I (*SOM* and *RVE2*) and Group III (*JMJ22* and *MAN7*) genes in the indicated RNA-sequencing datasets.

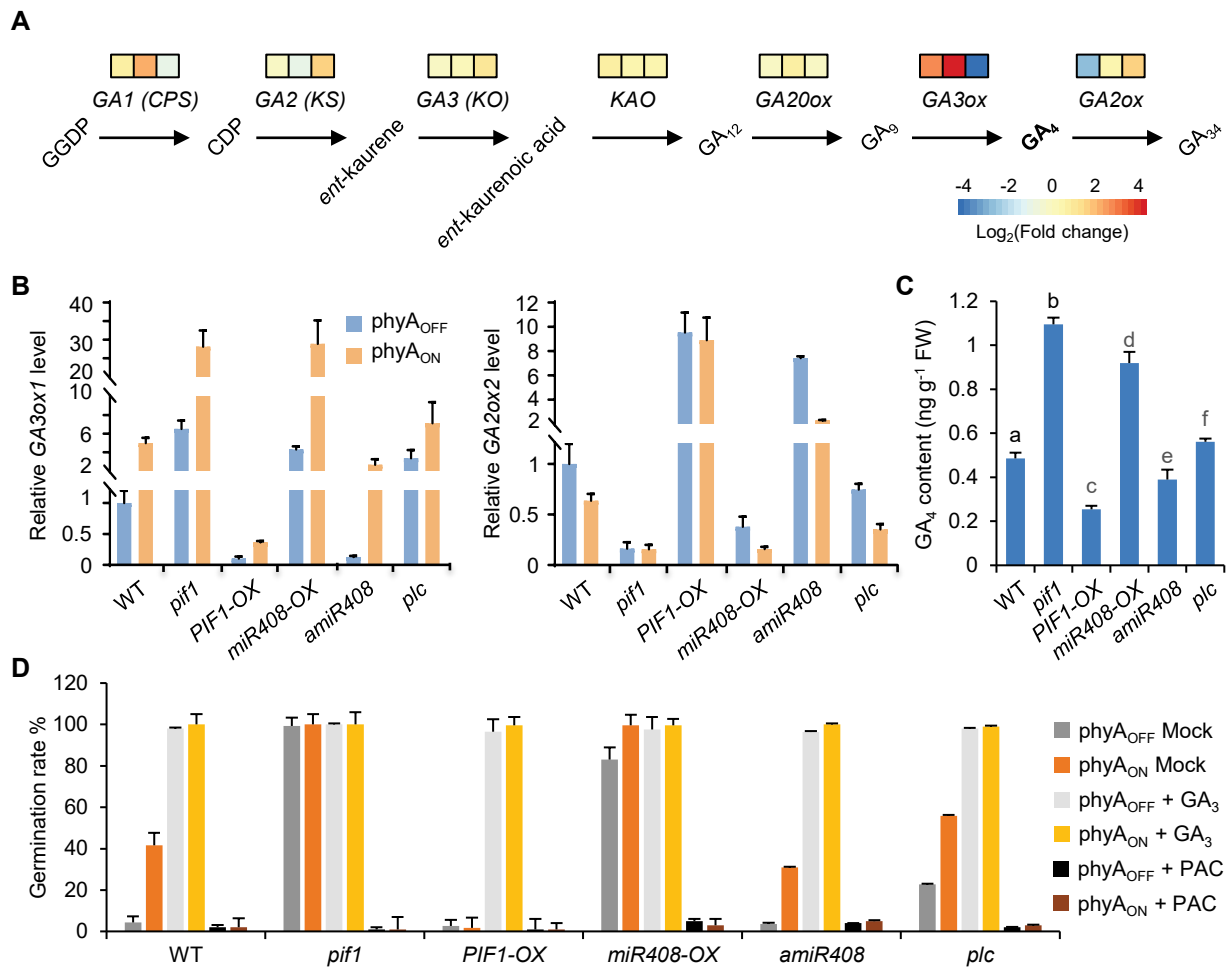

**Figure 9. The *PIF1-MIR408-PLC* Pathway Modulates GA Biosynthesis.**

(A) Diagram of a simplified GA biosynthesis pathway illustrating genes influenced by the *PIF1-MIR408-PLC* pathway. Genes associated with the individual biosynthesis steps are shown on top of the arrows. Colored boxes indicate relative expression levels of the corresponding gene in *pif1*, *mir408-OX*, and *iPLC-OX* against the respective controls. (B) RT-qPCR analysis of relative transcript level of the *GA3ox1* and *GA2ox2* genes in the indicated seeds under  $\text{phyA}_{\text{OFF}}$  and  $\text{phyA}_{\text{ON}}$ . Data are mean  $\pm$  SD ( $n = 3$ ). (C) Quantification of endogenous  $\text{GA}_4$  levels in imbibed seed of the indicated genotypes. Data are mean  $\pm$  SD ( $n = 3$ ). Different letters denote genotypes with significant differences (ANOVA,  $p < 0.05$ ). (D) Germination rates of the indicated seeds in  $\text{phyA}_{\text{OFF}}$  and  $\text{phyA}_{\text{ON}}$  with different treatments. Mock, no chemical treatment;  $\text{GA}_3$ , 10  $\mu\text{M}$   $\text{GA}_3$ ; PAC, 100  $\mu\text{M}$  paclobutrazol. Data are mean  $\pm$  SD ( $n = 3$ ).

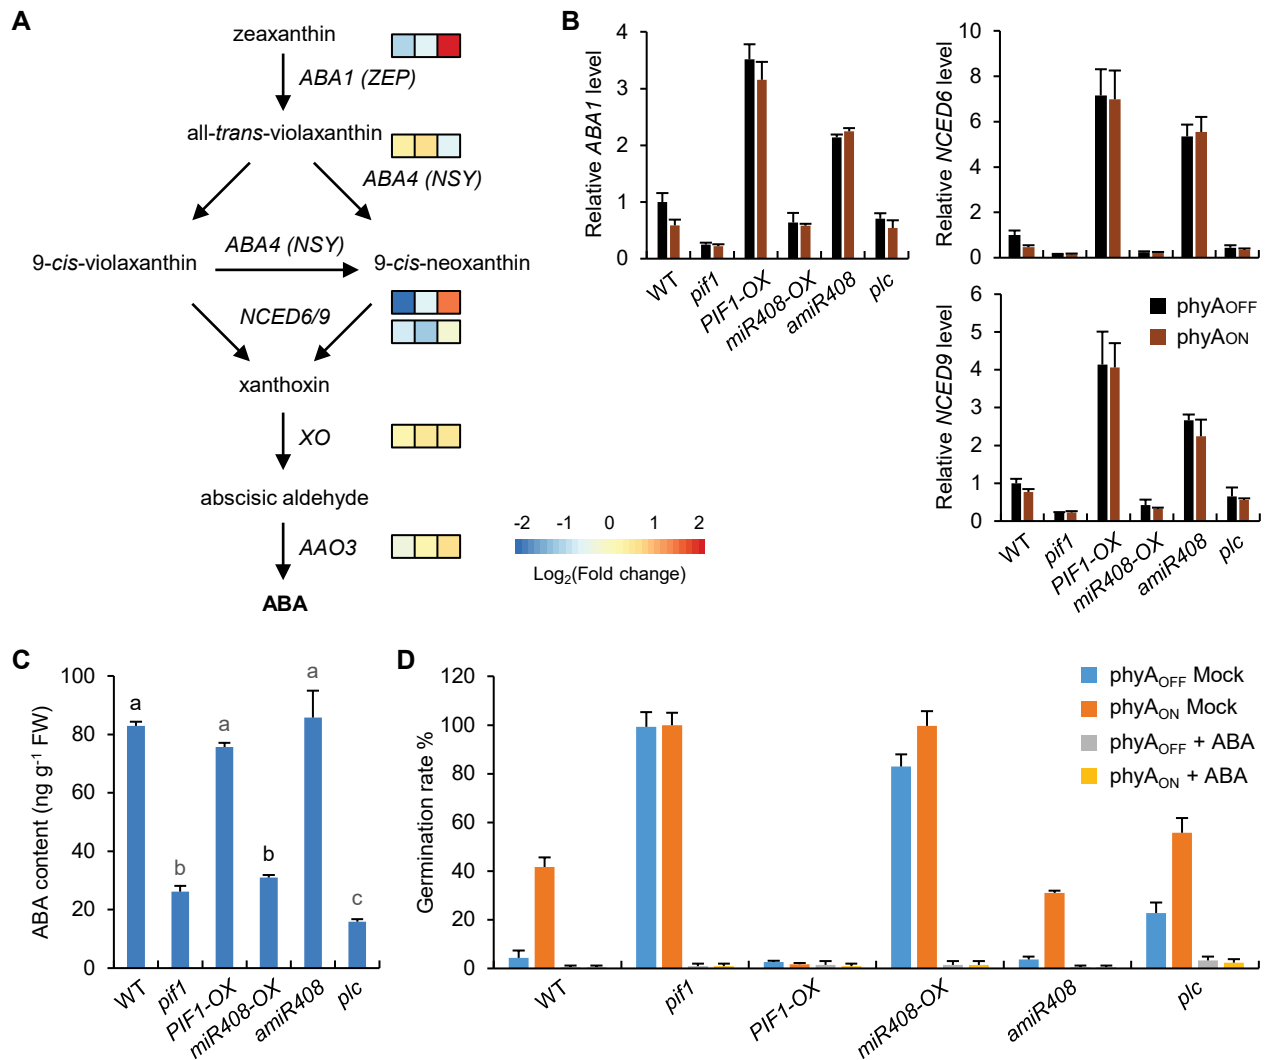

**Figure 10. The *PIF1-MIR408-PLC* Pathway Regulates ABA Biosynthesis.**

(A) Diagram of a simplified ABA biosynthesis pathway illustrating genes influenced by the *PIF1-MIR408-PLC* pathway. Colored boxes indicate relative expression levels of the corresponding gene in *pif1*, *miR408-OX*, and *iPLC-OX* against the respective controls. (B) RT-qPCR analysis of the relative transcript levels of ABA metabolic genes *ABA1*, *NCED6*, and *NCED9* in the indicated seeds. Data are mean  $\pm$  SD ( $n = 3$ ). (C) Quantification of endogenous ABA level in the indicated seeds. Data are mean  $\pm$  SD ( $n = 3$ ). Different letters denote groups with significant differences (ANOVA,  $p < 0.05$ ). (D) Germination rate of the indicated seeds in *phyA<sub>OFF</sub>* and *phyA<sub>ON</sub>* with or without the application of 5  $\mu$ M ABA.



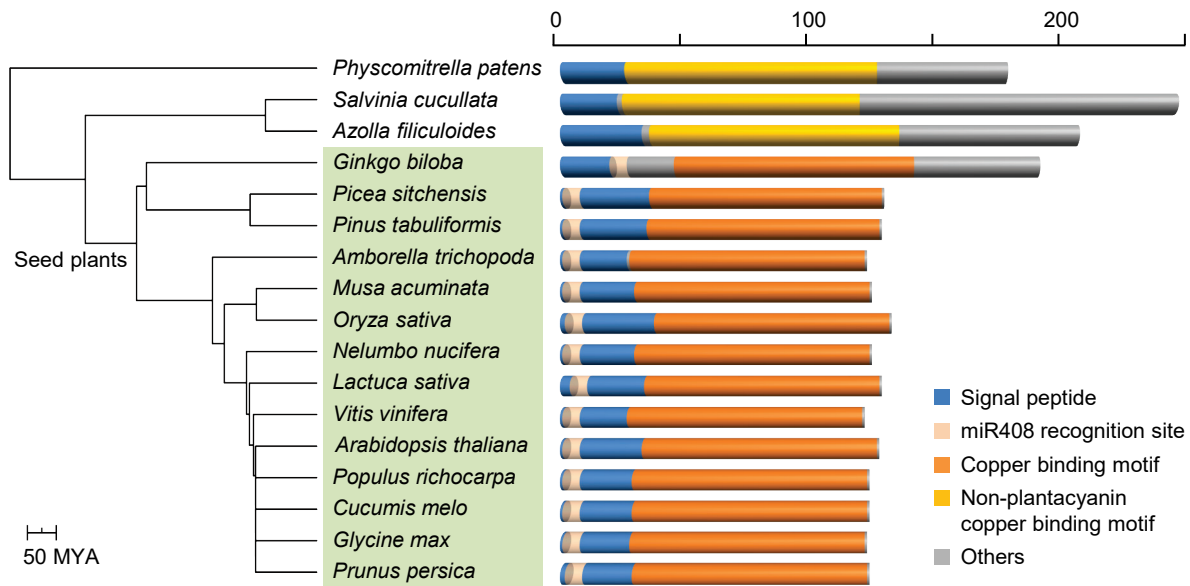

**Figure 11. PLC Exhibits Features Conserved in Seed Plants.**

Comparison of PLC and related blue copper proteins in representative land plants. Shown on the left is a species tree. Branch length reflects evolutionary divergence time in millions of years inferred from TimeTree. Species with identified PLCs are shaded in green. Domains are shown with different colors on the right. Scale represents accumulative number of amino acids.

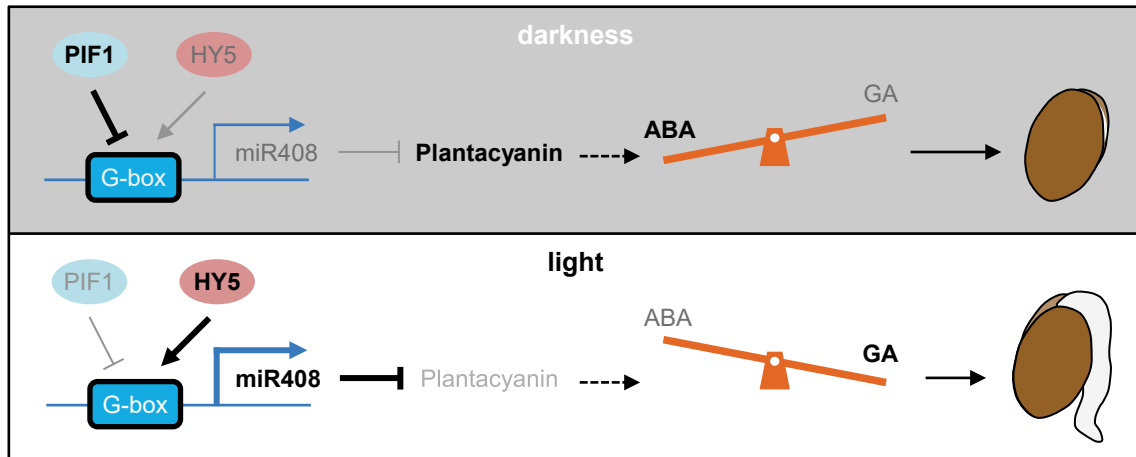

**Figure 12. Working Model of Light-dependent Seed Germination Mediated by PLC.**

The PIF1/HY5-miR408 module is critical for regulating PLC abundance in light-induced seed germination. Both PIF1 and HY5 can bind to the G-box cis-element in the *MIR408* promoter and thereby modulate cellular miR408 level. In darkness, stabilized PIF1 is the predominant regulator leading to transcriptional repression of miR408, which allows PLC to accumulate. Upon light irradiation, HY5 activation and PIF degradation leads to transcriptional de-repression of miR408, which in turn silences *PLC*. Removal of storage vacuole located PLC facilitates establishing the high-GA-low-ABA hormonal profile that eventually sets germination in motion and promotes post-germinative growth in light.

## Parsed Citations

- Abdel-Ghany, S.E., and Pilon, M. (2008).** MicroRNA-mediated systemic down-regulation of copper protein expression in response to low copper availability in Arabidopsis. *J Biol Chem.* 283: 15932-15945.  
Pubmed: [Author and Title](#)  
Google Scholar: [Author Only Title Only Author and Title](#)
- Almagro Armenteros, J.J., Tsirigos, K.D., Sønderby, C.K., Petersen, T.N., Winther, O., Brunak, S., von Heijne, G., and Nielsen, H. (2019).** SignalP 5.0 improves signal peptide predictions using deep neural networks. *Nat Biotechnol.* 37: 420-423.  
Pubmed: [Author and Title](#)  
Google Scholar: [Author Only Title Only Author and Title](#)
- Angelovici, R., Galili, G., Fernie, A.R., and Fait, A. (2010).** Seed desiccation: a bridge between maturation and germination. *Trends Plant Sci.* 15: 211-218.  
Pubmed: [Author and Title](#)  
Google Scholar: [Author Only Title Only Author and Title](#)
- Bernal, M., Ramiro, M.V., Casesb, R., Picorela, R., and Yruela, I. (2006).** Excess copper effect on growth, chloroplast ultrastructure, oxygen-evolution activity and chlorophyll fluorescence in Glycine max cell suspensions. *Physiologia Plantarum* 127: 312-325.  
Pubmed: [Author and Title](#)  
Google Scholar: [Author Only Title Only Author and Title](#)
- Bewley, J.D. (1997).** Seed germination and dormancy. *Plant Cell* 9: 1055-1066.  
Pubmed: [Author and Title](#)  
Google Scholar: [Author Only Title Only Author and Title](#)
- Burkhead, J.L., Reynolds, K.A., Abdel-Ghany, S.E., Cohu, C.M., and Pilon, M. (2009).** Copper homeostasis. *New Phytol.* 182: 799-816.  
Pubmed: [Author and Title](#)  
Google Scholar: [Author Only Title Only Author and Title](#)
- Castillon, A, Shen, H., and Huq, E. (2007).** Phytochrome Interacting Factors: Central players in phytochrome-mediated light signaling networks. *Trends Plant Sci.* 12: 514-521.  
Pubmed: [Author and Title](#)  
Google Scholar: [Author Only Title Only Author and Title](#)
- Chen, D., Xu, G., Tang, W., Jing, Y., Ji, Q., Fei, Z., and Lin, R. (2013).** Antagonistic basic helix-loop-helix/bZIP transcription factors form transcriptional modules that integrate light and reactive oxygen species signaling in Arabidopsis. *Plant Cell* 25: 1657-1673.  
Pubmed: [Author and Title](#)  
Google Scholar: [Author Only Title Only Author and Title](#)
- Cho, J., Ryu, J., Jeong, Y., Park, J., Song, J., Amasino, R.M., Noh, B., and Noh, Y. (2012).** Control of seed germination by light-induced histone arginine demethylation activity. *Dev Cell* 22: 736-748.  
Pubmed: [Author and Title](#)  
Google Scholar: [Author Only Title Only Author and Title](#)
- Dai, X., Zhuang, Z., and Zhao, P.X. (2018).** psRNATarget: a plant small RNA target analysis server. *Nucleic Acids Res.* 46: W49-W54.  
Pubmed: [Author and Title](#)  
Google Scholar: [Author Only Title Only Author and Title](#)
- De Rienzo, F., Gabdoulline, R.R., Menziani, M.C., and Wade, R.C. (2000).** Blue copper proteins: a comparative analysis of their molecular interaction properties. *Protein Sci.* 9: 1439-1454.  
Pubmed: [Author and Title](#)  
Google Scholar: [Author Only Title Only Author and Title](#)
- Dong, J., Kim, S.T., and Lord, E.M. (2005)** Plantacyanin plays a role in reproduction in Arabidopsis. *Plant Physiol.* 138: 778-789.  
Pubmed: [Author and Title](#)  
Google Scholar: [Author Only Title Only Author and Title](#)
- Eroglu, S., Giehl, R.F.H., Meier, B., Takahashi, M., Terada, Y., Ignatyev, K., Andresen, E., Küpper, H., Peiter, E., and von Wirén, N. (2017).** Metal tolerance protein 8 mediates manganese homeostasis and iron reallocation during seed development and germination. *Plant Physiol.* 174: 1633-1647.  
Pubmed: [Author and Title](#)  
Google Scholar: [Author Only Title Only Author and Title](#)
- Feng, H., Zhang, Q., Wang, Q., Wang, X., Liu, J., Li, M., Huang, L., and Kang Z. (2013).** Target of tae-miR408, a chemocyanin-like protein gene (TaCLP1), plays positive roles in wheat response to high-salinity, heavy cupric stress and stripe rust. *Plant Mol Biol.* 83: 433-443.  
Pubmed: [Author and Title](#)  
Google Scholar: [Author Only Title Only Author and Title](#)
- Finch-Savage, W.E., and Leubner-Metzger, G. (2006).** Seed dormancy and the control of germination. *New Phytol.* 171: 501-523.  
Pubmed: [Author and Title](#)  
Google Scholar: [Author Only Title Only Author and Title](#)
- Finkelstein, R., Reeves, W., Ariizumi, T., and Steber, C. (2008).** Molecular aspects of seed dormancy. *Annu Rev Plant Biol.* 59: 387-415.

Pubmed: [Author and Title](#)

Google Scholar: [Author Only Title Only Author and Title](#)

**Fu, J., Chu, J., Sun, X., Wang, J., and Yan, C. (2012). Simple, rapid, and simultaneous assay of multiple carboxyl containing phytohormones in wounded tomatoes by UPLC-MS/MS using single SPE purification and isotope dilution. *Anal Sci.* 28: 1081-1087.**

Pubmed: [Author and Title](#)

Google Scholar: [Author Only Title Only Author and Title](#)

**Giri, A.V., Anishetty, S., and Gautam, P. (2004). Functionally specified protein signatures distinctive for each of the different blue copper proteins. *BMC Bioinformatics* 9: 127.**

Pubmed: [Author and Title](#)

Google Scholar: [Author Only Title Only Author and Title](#)

**Guo, Z., Kuang, Z., Wang, Y., Zhao, Y., Tao, Y., Cheng, C., Yang, J., Lu, X., Hao, C., Wang, T., Cao, X., Wei, J., Li, L., and Yang, X. (2020). PriREN: A comprehensive encyclopedia of plant miRNAs. *Nucleic Acids Res.* 48: D1114-D1121.**

Pubmed: [Author and Title](#)

Google Scholar: [Author Only Title Only Author and Title](#)

**Gupta, A.S., Heinen, J.L., Holaday, A.S., Burke, J.J., and Allen, R.D. (1993). Increased resistance to oxidative stress in transgenic plants that overexpress chloroplastic Cu/Zn superoxide dismutase. *Proc Natl Acad Sci U S A* 90: 1629-1633.**

Pubmed: [Author and Title](#)

Google Scholar: [Author Only Title Only Author and Title](#)

**Guss, J.M., Merritt, E.A., Phizackerley, R.P., Hedman, B., Murata, M., Hodgson, K.O., and Freeman, H.C. (1998). Phase determination by multiple-wavelength x-ray diffraction: crystal structure of a basic blue copper protein from cucumbers. *Science* 241: 806-811.**

Pubmed: [Author and Title](#)

Google Scholar: [Author Only Title Only Author and Title](#)

**Han, X., Chang, X., Zhang, Z., Chen, H., He, H., Zhong, B., and Deng, X.W. (2019). Origin and evolution of core components responsible for monitoring light environment changes during plant terrestrialization. *Mol Plant* 12: 847-862.**

Pubmed: [Author and Title](#)

Google Scholar: [Author Only Title Only Author and Title](#)

**Hellens, R.P., Allan, A.C., Friel, E.N., Bolitho, K., Grafton, K., Templeton, M.D., Karunairetnam, S., Gleave, A.P., and Laing, W.A. (2005). Transient expression vectors for functional genomics, quantification of promoter activity and RNA silencing in plants. *Plant Methods* 1: 13.**

Pubmed: [Author and Title](#)

Google Scholar: [Author Only Title Only Author and Title](#)

**Iglesias-Fernández, R., Rodríguez-Gacio, M.C., Barrero-Sicilia, C., Carbonero, P., and Matilla, A.J. (2011) Three endo- $\beta$ -mannanase genes expressed in the micropilar endosperm and in the radicle influence germination of *Arabidopsis thaliana* seeds. *Planta* 233: 25-36.**

Pubmed: [Author and Title](#)

Google Scholar: [Author Only Title Only Author and Title](#)

**Jiang, Z., Xu, G., Jing, Y., Tang, W., and Lin, R. (2016). Phytochrome B and REVEILLE1/2-mediated signaling controls seed dormancy and germination in *Arabidopsis*. *Nat Commun.* 7: 12377.**

Pubmed: [Author and Title](#)

Google Scholar: [Author Only Title Only Author and Title](#)

**Jung, H.W., and Hwang, B.K. (2000). Isolation, partial sequencing, and expression of pathogenesis-related cDNA genes from pepper leaves infected by *Xanthomonas Campestris* P.v. *Vesicatoria*. *Mol Plant Microbe Interact.* 13: 136-142.**

Pubmed: [Author and Title](#)

Google Scholar: [Author Only Title Only Author and Title](#)

**Kallio, P., and Piironen, P. (1959). Effect of gibberellin on the termination of dormancy in some seeds. *Nature* 183: 1830-1831.**

Pubmed: [Author and Title](#)

Google Scholar: [Author Only Title Only Author and Title](#)

**Kim, D.H., Yamaguchi, S., Lim, S., Oh, E., Park, J., Hanada, A., Kamiya, Y., and Choi, G. (2008). SOMNUS, a CCCH-type zinc finger protein in *Arabidopsis*, negatively regulates light-dependent seed germination downstream of PIL5. *Plant Cell* 20: 1260-1277.**

Pubmed: [Author and Title](#)

Google Scholar: [Author Only Title Only Author and Title](#)

**Kim, S., Mollet, J.C., Dong, J., Zhang, K., Park, S.Y., and Lord, E.M. (2003) Chemocyanin, a small basic protein from the lily stigma, induces pollen tube chemotropism. *Proc Natl Acad Sci U S A* 100: 16125-16130**

Pubmed: [Author and Title](#)

Google Scholar: [Author Only Title Only Author and Title](#)

**Kim, S.A., Punshon, T., Lanzirrotti, A., Li, L., Alonso, J.M., Ecker, J.R., Kaplan, J., and Guerinot, M.L. (2006). Localization of iron in *Arabidopsis* seed requires the vacuolar membrane transporter VIT1. *Science* 314: 1295-1298.**

Pubmed: [Author and Title](#)

Google Scholar: [Author Only Title Only Author and Title](#)

**Klaumann, S., Nickolaus, S.D., Fürst, S.H., Starck, S., Schneider, S., Ekkehard, Neuhaus, H., and Trentmann, O. (2011). The tonoplast**

**copper transporter COPT5 acts as an exporter and is required for interorgan allocation of copper in Arabidopsis thaliana. New Phytol. 192: 393-404.**

Pubmed: [Author and Title](#)

Google Scholar: [Author Only Title Only Author and Title](#)

**Kuper, J., Llamas, A., Hecht, H.J., Mendel, R.R., and Schwarz, G. (2004). Structure of the molybdopterin-bound Cnx1G domain links molybdenum and copper metabolism. Nature 430: 803-806.**

Pubmed: [Author and Title](#)

Google Scholar: [Author Only Title Only Author and Title](#)

**Lanquar, V., Lelièvre, F., Bolte, S., Hamès, C., Alcon, C., Neumann, D., Vansuyt, G., Curie, C., Schröder, A., Krämer, U., Barbier-Brygoo, H., and Thomine, S. (2005). Mobilization of vacuolar iron by AtNRAMP3 and AtNRAMP4 is essential for seed germination on low iron. The EMBO J. 24: 4041-4051.**

Pubmed: [Author and Title](#)

Google Scholar: [Author Only Title Only Author and Title](#)

**Lee, N., and Choi, G. (2017). Phytochrome-interacting factor from Arabidopsis to liverwort. Curr Opin Plant Biol. 35: 54-60.**

Pubmed: [Author and Title](#)

Google Scholar: [Author Only Title Only Author and Title](#)

**Leivar, P., and Quail, P.H. (2010). PIFs: Pivotal components in a cellular signaling hub. Trends Plant Sci. 16: 19-28.**

Pubmed: [Author and Title](#)

Google Scholar: [Author Only Title Only Author and Title](#)

**Ma, X., Ma, J., Zhai, H., Xin, P., Chu, J., Qiao, Y., and Han, L. (2015). CHR729 is a CHD3 protein that controls seedling development in rice. PLoS One. 10: e0138934.**

Pubmed: [Author and Title](#)

Google Scholar: [Author Only Title Only Author and Title](#)

**Mao, Y., Zhang, H., Xu, N., Zhang, B., Gou, F., and Zhu, J.K. (2013). Application of the CRISPR-Cas System for efficient genome engineering in plants. Mol Plant 6: 2008-2011.**

Pubmed: [Author and Title](#)

Google Scholar: [Author Only Title Only Author and Title](#)

**Molina-Heredia, F.P., Wastl, J., Navarro, J.A., Bendall, D.S., Hervás, M., Howe, C.J., and De La Rosa, M.A. (2003). Photosynthesis: a new function for an old cytochrome? Nature 424: 33-34.**

Pubmed: [Author and Title](#)

Google Scholar: [Author Only Title Only Author and Title](#)

**Nambara, E., and Marion-Poll, A. (2005). Abscisic acid biosynthesis and catabolism. Annu Rev Plant Biol. 56: 165-185.**

Pubmed: [Author and Title](#)

Google Scholar: [Author Only Title Only Author and Title](#)

**Née, G., Xiang, Y., and Soppe, W.J. (2017). The release of dormancy, a wake-up call for seeds to germinate. Curr Opin Plant Biol. 35: 8-14.**

Pubmed: [Author and Title](#)

Google Scholar: [Author Only Title Only Author and Title](#)

**Nersissian, A.M., Immoos, C., Hill, M.G., Hart, P.J., Williams, G., Herrmann, R.G., Valentine, J.S. (1998). Uclacyanins, stellacyanins, and plantacyanins are distinct subfamilies of phytoeyanins: plant-specific mononuclear blue copper proteins. Protein Sci. 7: 1915-1929.**

Pubmed: [Author and Title](#)

Google Scholar: [Author Only Title Only Author and Title](#)

**Oh, E., Kang, H., Yamaguchi, S., Park, J., Lee, D., Kamiya, Y., Choi, G. (2009). Genome-wide analysis of genes targeted by PHYTOCHROME INTERACTING FACTOR 3-LIKE5 during seed germination in Arabidopsis. Plant Cell 21: 403-419.**

Pubmed: [Author and Title](#)

Google Scholar: [Author Only Title Only Author and Title](#)

**Oh, E., Kim, J., Park, E., Kim, J.I., Kang, C., and Choi, G. (2004). PIL5, a phytochrome-interacting basic helix-loop-helix protein, is a key negative regulator of seed germination in Arabidopsis thaliana. Plant Cell 16: 3045-3058.**

Pubmed: [Author and Title](#)

Google Scholar: [Author Only Title Only Author and Title](#)

**Oh, E., Yamaguchi, S., Hu, J.H., Yusuke, J., Jung, B., Paik, I., Lee, H.S., Sun, T.P., Kamiya, Y., and Choi, G. (2007). PIL5, a phytochrome-interacting bHLH protein, regulates gibberellin responsiveness by binding directly to the GAI and RGA promoters in Arabidopsis seeds. Plant Cell 19: 1192-1208.**

Pubmed: [Author and Title](#)

Google Scholar: [Author Only Title Only Author and Title](#)

**Oh, E., Yamaguchi, S., Kamiya, Y., Bae, G., Chung, W.I., and Choi, G. (2006). Light activates the degradation of PIL5 protein to promote seed germination through gibberellin in Arabidopsis. Plant J. 47: 124-139.**

Pubmed: [Author and Title](#)

Google Scholar: [Author Only Title Only Author and Title](#)

**Pan, J., Huang, D., Guo, Z., Kuang, Z., Zhang, H., Xie, X., Ma, Z., Gao, S., Lerdau, M.T., Chu, C., and Li, L. (2018). Overexpression of**

**microRNA408 enhances photosynthesis, growth, and seed yield in diverse plants. J Integr Plant Biol. 60: 323-340.**

Pubmed: [Author and Title](#)

Google Scholar: [Author Only Title Only Author and Title](#)

**Paszkiwicz, G., Gualberto, J.M., Benamar, A., Macherel, D., and Logan, D.C. (2017). Arabidopsis seed mitochondria are bioenergetically active immediately upon imbibition and specialize via biogenesis in preparation for autotrophic growth. Plant Cell 29: 109-128.**

Pubmed: [Author and Title](#)

Google Scholar: [Author Only Title Only Author and Title](#)

**Peñarrubia, L., Romero, P., Carrió-Seguí, A., Andrés-Bordería, A., Moreno, J., and Sanz, A. (2015). Temporal aspects of copper homeostasis and its crosstalk with hormones. Front Plant Sci. 6: 255.**

Pubmed: [Author and Title](#)

Google Scholar: [Author Only Title Only Author and Title](#)

**Pfeiffer, A., Shi, H., Tepperman, J.M., Zhang, Y., and Quail, P.H. (2014). Combinatorial complexity in a transcriptionally centered signaling hub in Arabidopsis. Mol Plant 7: 1598-1618.**

Pubmed: [Author and Title](#)

Google Scholar: [Author Only Title Only Author and Title](#)

**Roschzttardtz, H., Conéjéro, G., Curie, C., and Mari, S. (2009). Identification of the endodermal vacuole as the iron storage compartment in the Arabidopsis embryo. Plant Physiol. 151: 1329-1338.**

Pubmed: [Author and Title](#)

Google Scholar: [Author Only Title Only Author and Title](#)

**Rosenfeld, N., and Alon, U. (2003). Response delays and the structure of transcription networks. J Mol Biol. 329: 645-654.**

Pubmed: [Author and Title](#)

Google Scholar: [Author Only Title Only Author and Title](#)

**Ruan, X., Luo, F., Li, D., Zhang, J., Liu, Z., Xu, W., Huang, G., and Li, X. (2011). Cotton BCP genes encoding putative blue copper-binding proteins are functionally expressed in fiber development and involved in response to high-salinity and heavy metal stresses. Physiol Plant 141: 71-83.**

Pubmed: [Author and Title](#)

Google Scholar: [Author Only Title Only Author and Title](#)

**Rydén, L.G., and Hunt, L.T. (1993). Evolution of protein complexity: the blue copper-containing oxidases and related proteins. J Mol Evol. 36: 41-66.**

Pubmed: [Author and Title](#)

Google Scholar: [Author Only Title Only Author and Title](#)

**Sakuraba, Y., Kanno, S., Mabuchi, A., Monda, K., Iba, K., and Yanagisawa, S. (2018). A phytochrome-B-mediated regulatory mechanism of phosphorus acquisition. Nat Plants 4: 1089-1101.**

Pubmed: [Author and Title](#)

Google Scholar: [Author Only Title Only Author and Title](#)

**Schulten, A., Bytomski, L., Quintana, J., Bernal, M., and Krämer, U. (2019). Do Arabidopsis Squamosa promoter binding Protein-Like genes act together in plant acclimation to copper or zinc deficiency? Plant Direct 3: e00150.**

Pubmed: [Author and Title](#)

Google Scholar: [Author Only Title Only Author and Title](#)

**Seo, M., Nambara, E., Choi, G., and Yamaguchi, S. (2009). Interaction of light and hormone signals in germinating seeds. Plant Mol Biol. 69: 463-472.**

Pubmed: [Author and Title](#)

Google Scholar: [Author Only Title Only Author and Title](#)

**Seo, M., Peeters, A.J., Koiwai, H., Oritani, T., Marion-Poll, A., Zeevaert, J.A., Koornneef, M., Kamiya, Y., and Koshida T. (2000). The Arabidopsis aldehyde oxidase 3 (AO3) gene product catalyzes the final step in abscisic acid biosynthesis in leaves. Proc Natl Acad Sci U S A 97: 12908-12913.**

Pubmed: [Author and Title](#)

Google Scholar: [Author Only Title Only Author and Title](#)

**Shen, H., Zhu, L., Castillon, A., Majee, M., Downie, B., and Huq, E. (2008). Light-induced phosphorylation and degradation of the negative regulator PHYTOCHROME-INTERACTING FACTOR1 from Arabidopsis depend upon its direct physical interactions with photoactivated phytochromes. Plant Cell 20: 1586-1602.**

Pubmed: [Author and Title](#)

Google Scholar: [Author Only Title Only Author and Title](#)

**Shi, H., Lyu, M., Luo, Y., Liu, S., Li, Y., He, H., Wei, N., Deng, X.W., and Zhong, S. (2018). Genome-wide regulation of light-controlled seedling morphogenesis by three families of transcription factors. Proc Natl Acad Sci U S A 115: 6482-6487.**

Pubmed: [Author and Title](#)

Google Scholar: [Author Only Title Only Author and Title](#)

**Shi, H., Wang, X., Mo, X., Tang, C., Zhong, S., Deng, X.W. (2015) Arabidopsis DET1 degrades HFR1 but stabilizes PIF1 to precisely regulate seed germination. Proc Natl Acad Sci U S A 112: 3817-3822.**



Pubmed: [Author and Title](#)

Google Scholar: [Author Only Title Only Author and Title](#)

**Shi, H., Zhong, S., Mo, X., Liu, N., Nezames, C.D., Deng, X.W. (2013). HFR1 sequesters PIF1 to govern the transcriptional network underlying light-initiated seed germination in Arabidopsis. Plant Cell 25: 3770-3784.**

Pubmed: [Author and Title](#)

Google Scholar: [Author Only Title Only Author and Title](#)

**Shoval, O., and Alon, U. (2010). SnapShot: network motifs. Cell 143: 326-e1.**

Pubmed: [Author and Title](#)

Google Scholar: [Author Only Title Only Author and Title](#)

**Shu, K., Liu, X.D., Xie, Q., and He, Z.H. (2016). Two faces of one seed: hormonal regulation of dormancy and germination. Mol Plant 9: 34-45.**

Pubmed: [Author and Title](#)

Google Scholar: [Author Only Title Only Author and Title](#)

**Sun, T.P., and Kamiya, Y. (1997). Regulation and cellular localization of ent-kaurene synthesis. Physiol Plant. 101: 701-708.**

Pubmed: [Author and Title](#)

Google Scholar: [Author Only Title Only Author and Title](#)

**Sun, Y, Wu, Z, Wang, Y, Yang, J, Wei, G, and Chou, M. (2019). Identification of phytoeyanin gene family in legume plants and their involvement in nodulation of *Medicago truncatula*. Plant Cell Physiol. 60: 900-915.**

Pubmed: [Author and Title](#)

Google Scholar: [Author Only Title Only Author and Title](#)

**Toledo-Ortiz, G., Johansson, H., Lee, K.P., Bou-Torrent, J., Stewart, K., Steel, G., Rodríguez-Concepción, M., and Halliday, K.J. (2014). The HY5-PIF regulatory module coordinates light and temperature control of photosynthetic gene transcription. PLoS Genet. 10: e1004416.**

Pubmed: [Author and Title](#)

Google Scholar: [Author Only Title Only Author and Title](#)

**Wang, K., and Frame, B. (2009). Biolistic gun-mediated maize genetic transformation. Methods Mol Biol. 526: 29-45.**

Pubmed: [Author and Title](#)

Google Scholar: [Author Only Title Only Author and Title](#)

**Weigel, M., Varotto, C., Pesaresi, P., Finazzi, G., Rappaport, F., Salamini, F., and Leister, D. (2003). Plastocyanin is indispensable for photosynthetic electron flow in *Arabidopsis thaliana*. J. Biol Chem. 278: 31286-31289.**

Pubmed: [Author and Title](#)

Google Scholar: [Author Only Title Only Author and Title](#)

**Winter, D., Vinegar, B., Nahal, H., Ammar, R., Wilson, G.V., and Provart, N.J. (2007). An "Electronic Fluorescent Pictograph" browser for exploring and analyzing large-scale biological data sets. PLoS One. 8: e718.**

Pubmed: [Author and Title](#)

Google Scholar: [Author Only Title Only Author and Title](#)

**Yamaguchi, S. (2008). Gibberellin metabolism and its regulation. Annu Rev Plant Biol. 59: 225-251.**

Pubmed: [Author and Title](#)

Google Scholar: [Author Only Title Only Author and Title](#)

**Ye, N., Li, H., Zhu, G., Liu, Y., Liu, R., Xu, W., Jing, Y., Peng, X., and Zhang, J. (2014). Copper suppresses abscisic acid catabolism and catalase activity, and inhibits seed germination of rice. Plant Cell Physiol. 55: 2008-2016.**

Pubmed: [Author and Title](#)

Google Scholar: [Author Only Title Only Author and Title](#)

**Yoo, S.D., Cho, Y.H., and Sheen, J. (2007). Arabidopsis mesophyll protoplasts: a versatile cell system for transient gene expression analysis. Nat Protoc. 2: 1565-1572.**

Pubmed: [Author and Title](#)

Google Scholar: [Author Only Title Only Author and Title](#)

**Zhang, H., and Li, L. (2013). SQUAMOSA promoter binding protein-like7 regulated microRNA408 is required for vegetative development in Arabidopsis. Plant J. 74: 98-109.**

Pubmed: [Author and Title](#)

Google Scholar: [Author Only Title Only Author and Title](#)

**Zhang, H., Zhao, X., Li, J., Cai, H., Deng, X.W., and Li, L. (2014). MicroRNA408 is critical for the HY5-SPL7 gene network that mediates the coordinated response to light and copper. Plant Cell 26: 4933-4953.**

Pubmed: [Author and Title](#)

Google Scholar: [Author Only Title Only Author and Title](#)

**Zhong, S., Shi, H., Xue, C., Wei, N., Guo, H., and Deng, X.W. (2014). Ethylene-orchestrated circuitry coordinates a seedling's response to soil cover and etiolated growth. Proc Natl Acad Sci U S A. 111: 3913-3920.**

Pubmed: [Author and Title](#)

Google Scholar: [Author Only Title Only Author and Title](#)

**Zhong, S., Zhao, M., Shi, T., Shi, H., An, F., Zhao, Q., and Guo, H. (2009). EIN3/EIL1 cooperate with PIF1 to prevent photo-oxidation and to promote greening of Arabidopsis seedlings. Proc Natl Acad Sci U S A. 106: 21431-21436.**

Pubmed: [Author and Title](#)

Google Scholar: [Author Only](#) [Title Only](#) [Author and Title](#)

**Zhou, M.G., Gu, L.F., Li, P.C., Song, X.W., Wei, L.Y., Chen, ZY., and Cao, X.F. (2010). Degradome sequencing reveals endogenous small RNA targets in rice (*Oryza sativa* L. ssp. indica). Front Biol. 5: 67-90.**

Pubmed: [Author and Title](#)

Google Scholar: [Author Only](#) [Title Only](#) [Author and Title](#)

**Zhuang, Y., Zuo, D., Tao, Y., Cai, H., and Li, L. (2020). Laccase3-based extracellular domain provides possible positional information for directing Casparian strip formation in Arabidopsis. Proc Natl Acad Sci U S A 117: 15400-15402.**

Pubmed: [Author and Title](#)

Google Scholar: [Author Only](#) [Title Only](#) [Author and Title](#)

**Zuo, J., Niu, Q.W., and Chua, N.H. (2000). An estrogen receptor-based transactivator XVE mediates highly inducible gene expression in transgenic plants. Plant J. 24: 265-273.**

Pubmed: [Author and Title](#)

Google Scholar: [Author Only](#) [Title Only](#) [Author and Title](#)
